# Supplementary material for: Expectations, end-of-life fears and end-of-life communication among palliative patients with cancer and caregivers: a cross-sectional study
Source: PubMed Central journal article supplement — BMJ Open. 2022 May 11;12(5):e058531. doi: 10.1136/bmjopen-2021-058531 (PMC9096546; doi:10.1136/bmjopen-2021-058531), 2022-05-11
Supplement: bmjopen-2021-058531.draft_revisions.pdf [file bmjopen-2021-058531.draft_revisions.pdf]

# BMJ Open

BMJ Open is committed to open peer review. As part of this commitment we make the peer review history of every article we publish publicly available.

When an article is published we post the peer reviewers' comments and the authors' responses online. We also post the versions of the paper that were used during peer review. These are the versions that the peer review comments apply to.

The versions of the paper that follow are the versions that were submitted during the peer review process. They are not the versions of record or the final published versions. They should not be cited or distributed as the published version of this manuscript.

BMJ Open is an open access journal and the full, final, typeset and author-corrected version of record of the manuscript is available on our site with no access controls, subscription charges or pay-per-view fees (<http://bmjopen.bmj.com>).

If you have any questions on BMJ Open's open peer review process please email [info.bmjopen@bmj.com](mailto:info.bmjopen@bmj.com)

# BMJ Open

## **“I don’t want to make you sad...” Expectations, end-of-life fears and end-of-life communication among palliative cancer patients and their family members**

|                               |                                                                                                                                                                                                                                                                                                                                                                                                                                                                                                                                                                                                                                                                                                                        |
|-------------------------------|------------------------------------------------------------------------------------------------------------------------------------------------------------------------------------------------------------------------------------------------------------------------------------------------------------------------------------------------------------------------------------------------------------------------------------------------------------------------------------------------------------------------------------------------------------------------------------------------------------------------------------------------------------------------------------------------------------------------|
| Journal:                      | <i>BMJ Open</i>                                                                                                                                                                                                                                                                                                                                                                                                                                                                                                                                                                                                                                                                                                        |
| Manuscript ID                 | bmjopen-2021-058531                                                                                                                                                                                                                                                                                                                                                                                                                                                                                                                                                                                                                                                                                                    |
| Article Type:                 | Original research                                                                                                                                                                                                                                                                                                                                                                                                                                                                                                                                                                                                                                                                                                      |
| Date Submitted by the Author: | 19-Oct-2021                                                                                                                                                                                                                                                                                                                                                                                                                                                                                                                                                                                                                                                                                                            |
| Complete List of Authors:     | Von Blanckenburg, Pia; Philipps-Universität Marburg, Clinical Psychology and Psychotherapy<br>Riera Knorrenschild, Jorge; Philipps-Universität Marburg Fachbereich Medizin, Department of Internal Medicine, Div. Haematology and Oncology<br>Hofmann, Mareike; Philipps-Universität Marburg, Department of Clinical Psychology and Psychotherapy<br>Fries, Hansjakob; University of Leipzig Faculty of Medicine, Div. Haematology and Oncology<br>Nestoriuc, Yvonne; Helmut-Schmidt-University / University of the Armed Forces Hamburg<br>Rief, Winfried; Philipps-Universität Marburg, Department of Clinical Psychology and Psychotherapy<br>Seifart, Carola; Philipps-Universität Marburg, Department of Medicine |
| Keywords:                     | ONCOLOGY, Quality in health care < HEALTH SERVICES ADMINISTRATION & MANAGEMENT, PUBLIC HEALTH                                                                                                                                                                                                                                                                                                                                                                                                                                                                                                                                                                                                                          |
|                               |                                                                                                                                                                                                                                                                                                                                                                                                                                                                                                                                                                                                                                                                                                                        |

SCHOLARONE™  
Manuscripts

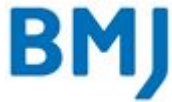

I, the Submitting Author has the right to grant and does grant on behalf of all authors of the Work (as defined in the below author licence), an exclusive licence and/or a non-exclusive licence for contributions from authors who are: i) UK Crown employees; ii) where BMJ has agreed a CC-BY licence shall apply, and/or iii) in accordance with the terms applicable for US Federal Government officers or employees acting as part of their official duties; on a worldwide, perpetual, irrevocable, royalty-free basis to BMJ Publishing Group Ltd ("BMJ") its licensees and where the relevant Journal is co-owned by BMJ to the co-owners of the Journal, to publish the Work in this journal and any other BMJ products and to exploit all rights, as set out in our [licence](#).

The Submitting Author accepts and understands that any supply made under these terms is made by BMJ to the Submitting Author unless you are acting as an employee on behalf of your employer or a postgraduate student of an affiliated institution which is paying any applicable article publishing charge ("APC") for Open Access articles. Where the Submitting Author wishes to make the Work available on an Open Access basis (and intends to pay the relevant APC), the terms of reuse of such Open Access shall be governed by a Creative Commons licence – details of these licences and which [Creative Commons](#) licence will apply to this Work are set out in our licence referred to above.

Other than as permitted in any relevant BMJ Author's Self Archiving Policies, I confirm this Work has not been accepted for publication elsewhere, is not being considered for publication elsewhere and does not duplicate material already published. I confirm all authors consent to publication of this Work and authorise the granting of this licence.

1  
2  
3  
4 **Title: “I don’t want to make you sad...” Expectations, end-of-life fears and**  
5  
6  
7 **end-of-life communication among palliative cancer patients and their**  
8  
9 **family members**  
10  
11  
12

13 von Blanckenburg, Pia,<sup>1</sup> Riera Knorrenschild, Jorge,<sup>2</sup> Hofmann, Mareike,<sup>1</sup> Fries, Hansjakob,<sup>3</sup>  
14 Nestoriuc, Yvonne,<sup>4</sup> Rief, Winfried,<sup>1</sup> Seifart, Carola<sup>5</sup>  
15  
16

17  
18  
19 **Corresponding author:**

20 Dr. Pia von Blanckenburg  
21 Department of Clinical Psychology and Psychotherapy  
22 Philipps-University of Marburg Gutenbergstr. 18, 35032 Marburg  
23 eMail: [blanckep@staff.uni-marburg.de](mailto:blanckep@staff.uni-marburg.de),  
24 Phone: 0049 6421 2824951  
25

26  
27 <sup>1</sup> Department of Clinical Psychology and Psychotherapy, Philipps-University of Marburg, Marburg,  
28 Germany  
29

30 <sup>2</sup> Department of Internal Medicine, Div. Haematology and Oncology, Philipps-University of Marburg,  
31 Marburg, Germany  
32

33 <sup>3</sup> Div. Haematology and Oncology, University of Leipzig, Leipzig, Germany  
34

35 <sup>4</sup> Department of Clinical Psychology and Psychotherapy, Helmut-Schmidt-University, Hamburg,  
36 Germany  
37

38 <sup>5</sup> Faculty of Medicine, Research Group Medical Ethics (AGEM), Philipps-University of Marburg,  
39 Marburg, Germany  
40  
41  
42  
43  
44

45 **Keywords:** end of life, communication, family member, palliative care  
46  
47  
48  
49  
50

51 **Word count:** 3,346 words (not including abstract, tables, figure legends and references)  
52  
53  
54  
55  
56  
57  
58  
59  
60

## Strengths and limitations of this study

- The study investigated expectations and concerns of cancer patients and family members regarding end-of-life discussions quantitatively
- Differences between patients and family members were analysed in a multivariate analysis
- As common in this research topic and study population, the refusal rate was high and most of the family members were female.

For peer review only

**ABSTRACT**

**Objectives** During serious illness, open communication with family members can ensure high quality care. Without end-of-life conversations, family members may become surrogates and decision-makers without knowing the preferences of the patient. However, expectations and fears may influence the initiation of these conversations. The present study investigates differences between palliative cancer patients and family members regarding expectations of end-of-life conversations, end-of-life fears, and experiences with end-of-life conversations.

**Design** A cross-sectional study using a semi-structured interview and a paper-based questionnaire

**Setting** University Hospital in Germany

**Participants** 151 participants: 85 palliative cancer patients (mean age: 62.8 years, 65.9% male) and 66 relatives (mean age: 56.3 years, 28.8% male)

**Primary and secondary outcome measures** Expectations, end-of-life fears, and experiences of end-of-life discussions

**Results** Patients and families wish for the patient to be self-determined. In general, participants reported more positive than negative expectations of end-of-life discussions. Importantly, concern about emotionally burdening the other person was rated much higher in a family context than a professional context ( $F(1,149)=316.958, p<.001, \eta^2=.680$ ), even though the emotional relief was expected to be higher ( $F(1,149)=46.115, p<.001, \eta^2=.236$ ). Family members reported more fears about the last period of life and more fears about end-of-life discussions than palliative patients, whereas palliative patients tended to avoid the topics of death and dying to a higher degree.

**Conclusions** There seems to exist a 'self-other' paradox: palliative patients and their relatives expect substantial personal relief when openly talking about end-of-life issues, but also expect the other person to be burdened by such a conversation. Professionals repeatedly need to initiate end-of-life conversations.

## INTRODUCTION

During serious illness, open communication can improve the quality of end-of-life care. These conversations should include caregivers and family members, because the responsibility of making medical decisions often shifts to a surrogate due to patients' bad condition [1, 2]. End-of-life (EOL) conversations can ensure that the decisions made are consistent with the values and wishes of the patient. However, patients and their families seem to avoid EOL conversations [3, 4]. In one study, only 21 per cent of the relatives knew patients' preferences regarding possible EOL situations, although 75 per cent rated themselves confident about knowing patients' goals [5]. Nevertheless, not knowing patients' wishes can lead to emotional burden and distress in surrogates [6]. The prevalence of depression and complicated grief was shown to be higher in bereaved families without EOL communication [7]. Thus, knowing which treatment is consistent with the patient's preferences has the potential to reduce the negative effects on family members [8].

Many difficulties are known that discourage families from talking about EOL issues: the patient-caregiver relationship (e.g. differences in values or opinions), a lack of communication skills (e.g. not knowing how to talk about EOL care) or external circumstances (e.g. not having any close person to talk to) [4]. Moreover, cognitive factors as expectations can prevent families speaking about death and dying (e.g. talking about death speeds up the process of dying) [4]. Expectations are specific and flexible cognitions that 1) are forward-looking and 2) concentrate on whether an event or an experience will occur or not occur [9]. Expectations predict different health-related behaviours such as the intake of medication in breast cancer patients or the utilization of psychosocial help [10–12]. The role of caregivers' expectations in healthcare communication was recently investigated in a paediatric setting [13]. In the EOL care context, expectations such as "Speaking about my own death will upset you" may especially deter persons from EOL communication. To our knowledge, there is no study that has analysed the expectations of EOL communication in palliative patients and their family members.

Next to cognitions, the most prevalent communication barrier is related to emotional factors (e.g. protecting others from difficult emotions). Another emotional barrier that inhibits EOL communication is death anxiety. Death anxiety (thanatophobia) includes the fear of death and avoidance of news that reminds one of death [14]. In oncological samples, 8.2–42 per cent of patients showed moderate levels of death anxiety [15–18], but it is also present in healthy populations [19, 20]. Death anxiety can be a relevant factor in avoiding EOL topics, whereas death

1  
2 acceptance is associated with a higher degree of awareness and ability to reflect on death and dying  
3 [21, 22]. Thus, death anxiety and the tendency to avoid death-related topics are relevant  
4 determinants to address in this context.  
5  
6

7  
8 Therefore, the present study investigates a) the degree of participation in EOL care; b) expectations  
9 of EOL conversations; c) EOL fears; and d) experiences with EOL conversations among palliative  
10 cancer patients and family members. Additionally, the study analyses the correlations between the  
11 reported expectations, fears and experiences.  
12  
13  
14  
15

## 16 **METHODS**

### 17 **Participants and design**

18  
19  
20  
21  
22 Inclusion criteria for all participants were sufficient German language skills and a minimum age of  
23 18. For the patient group, an oncological diagnosis of a malignant neoplasm, a palliative setting, and  
24 the identification of a limited prognosis, using the surprise-question ("Would I be surprised if this  
25 patient died in the next year?") by the attending physician, were additional inclusion criteria. Family  
26 members had to be potential caregivers of the patient (e.g. partner, child, parent). After being  
27 informed about the study and having given their written informed consent, patients were  
28 interviewed by five psychology Master's students and medical doctoral students under the  
29 supervision of CS, YN, MH and PB.  
30  
31  
32  
33  
34  
35  
36

### 37 **Ethics**

38  
39  
40  
41 The study was approved by the institutional review board of the Medical School, University of  
42 Marburg (AZ:47/12). Before participation, subjects gave written informed consent.  
43  
44

### 45 **Assessment instruments**

46  
47  
48 Sociodemographic and clinical variables were assessed by the treating doctor. Then, patients were  
49 interviewed in a semi-structured interview. All questions in the semi-structured interview could be  
50 answered on a Likert scale from 0 ("not at all") to 4 ("totally agree" or "very much"). Three questions  
51 addressed self-determination in EOL care (e.g. "It is important to me to be self-determined."); seven  
52 questions were about persons who should decide about EOL care (e.g. "I want decisions about my  
53 medical EOL care to be taken only by myself"); six questions addressed expectations of EOL care  
54 (e.g. "I expect... emotional release/ practical support/ emotional burden/..."); and five questions  
55  
56  
57  
58  
59  
60



1  
2 were about fears regarding EOL conversations (e.g. “I am very afraid of my/ my relatives’ last period  
3 of life”, “I avoid talking about EOL topics”). Moreover, three questions addressed the experience of  
4 EOL conversations (burdening, helpful, satisfying) and one question asked whom palliative patients  
5 and their family members had spoken to (in the informal or professional context). Moreover, anxiety  
6 and depression were measured using the Hospital Anxiety and Depression Scale (HADS, German-  
7 Version) [23], which is a commonly used self-administered questionnaire. Items are rated on a four-  
8 point scale and scored from 0 to 3, where a higher score indicates more anxiety/depression.  
9 Therefore, total scores for each subscale range from 0 to 21, with a Cronbach’s alpha of  $\alpha=.81$  for  
10 the anxiety-scale and  $\alpha=.69$  for the depression scale.  
11  
12  
13  
14  
15  
16  
17  
18

### 19 **Patient and public involvement**

20  
21  
22 Cancer patients were involved to see if the semi-structured interview was understandable and  
23 comprehensive. Otherwise, there was no direct patient or public involvement.  
24  
25

### 26 **Data analysis**

27  
28  
29 Analyses were performed using SPSS 26 (SPSS Inc. IBM, Chicago, Illinois, USA), with statistical  
30 significance set at  $p < .05$ . The data were screened for univariate outliers, missing data and violations  
31 to the assumptions of analysis. Missing data at random (2.1%) were imputed using multiple  
32 imputation. To analyse expectations, fears and experiences of EOL conversations in cancer patients  
33 and family members, and to control for possible influences of demographic and clinical  
34 characteristics, (multivariate) analysis of covariance (MANOVA and MANCOVA) and univariate  
35 analysis of covariance (ANOVA) were conducted. For categorical data, chi-square tests were used.  
36 Pearson correlations were used to analyse relationships between variables. Further details are  
37 reported in the results section.  
38  
39  
40  
41  
42  
43  
44  
45  
46

## 47 **RESULTS**

### 48 **Participants**

49  
50  
51 A total of 165 palliative patients were eligible, but 76 (46.1%) refused to participate. The most  
52 common reasons for refusal were fear of emotional burden ( $n=32$ , 42.1%), physical exhaustion  
53 ( $n=15$ , 19.7%), and the patient not wanting to talk about this topic ( $n=11$ , 14.5%). Of the 143 eligible  
54 family members of these patients, 68 (47.6%) participated. Family members refused participation  
55 because of a fear of emotional burden ( $n=25$ , 32.5%) and effort ( $n=18$ , 32.4%). In addition, four  
56  
57  
58  
59  
60

1  
2 patients (4.49%) and two relatives (2.94%) discontinued their participation because of physical  
3 problems (e.g. pain) or organizational aspects. Thus, the final sample consisted of 85 palliative  
4 cancer patients and 66 family members. Demographic and clinical characteristics of the study  
5 participants are listed in Table 1.  
6  
7  
8  
9

10 \*\*Table 1\*\*

### 11 12 13 **Who should decide about end-of-life care?**

14  
15  
16 The item "It is important to me to be self-determined" was agreed with by 95.3 per cent of patients  
17 and 92.4 per cent of family members. Moreover, 89.3 per cent of patients and 89.1 per cent of  
18 family members agreed with the item: "The right to self-determination must be valid beyond death"  
19 ( $V=.98$ ,  $F(2,145)=0.143$ ,  $p=.869$ ,  $\eta_p^2=.002$ ). In a MANOVA, there were no significant differences  
20 between patients and family members regarding self-determination. To concretize who should  
21 decide about EOL care and to analyse possible differences between patients and family members,  
22 a MANOVA with the between-subject factor 'status' and seven different degrees of personal  
23 involvement in decisions about EOL care (see Figure 1) as dependent variables was conducted. No  
24 significant effect of status ( $V=.97$ ,  $F(7,143)=0.615$ ,  $p=.743$ ,  $\eta_p^2=.029$ ) was found. Thus, cancer  
25 patients and their family members reported the same preferences, namely that the patients, their  
26 family members and the physician should participate in a shared decision-making process about EOL  
27 care.  
28  
29  
30  
31  
32  
33  
34  
35  
36  
37  
38

39 \*\*Figure 1\*\*

### 40 41 42 **Expectations of end-of-life discussions**

43  
44  
45 To analyse differences in expectations of EOL communication in the professional versus the informal  
46 context among cancer patients and their family members, a MANOVA with the between-subject  
47 factor 'status', the within-subject factor 'context' and six different expectations of EOL fears as  
48 dependent variables was conducted. No significant effect of status ( $V=.93$ ,  $F(6,144)=1.757$ ,  $p=.112$ ,  
49  $\eta_p^2=.068$ ) was found, but a significant effect of context was seen ( $V=.94$ ,  $F(6,144)=65.806$ ,  $p<.001$ ,  
50  $\eta_p^2=.733$ ). Subsequent univariate analyses showed a higher score for the expectation of emotional  
51 relief ( $F(1,149)=46.115$ ,  $p<.001$ ,  $\eta_p^2=.236$ ) and the expectation of practical support ( $F(1,149)=38.665$ ,  
52  $p<.001$ ,  $\eta_p^2=.206$ ) in the informal context than in the professional context. Moreover, univariate  
53 analyses showed a significant higher score in the expectation of negative emotions  
54  
55  
56  
57  
58  
59  
60

( $F(1,149)=54.820, p<.001, \eta_p^2=.269$ ) and in the expectation regarding the emotional burden of the other person ( $F(1,149)=316.958, p<.001, \eta_p^2=.680$ ) in the informal context than in the professional context. There were no context effects on the expectations of refusal ( $F(1,149)=0.194, p=.118, \eta_p^2=.016$ ) or wishes not being respected ( $F(1,149)=0.131, p=.320, \eta_p^2=.007$ ).

Thus, cancer patients and their family members reported a higher tendency to expect emotional relief and practical support from conversations with their family and friends than from conversations with professionals. On the other hand, they reported higher expectations of negative emotions and burdening the other person in informal conversations than in conversations with professionals. The results remained stable after controlling for possible confounders such as age and gender.

**\*\*Figure 2\*\***

### **End-of-life fears**

In a MANOVA with the between-subject factor status and five different aspects of EOL fears as dependent variables, a significant effect of status ( $V=.72, F(5,143)=10.963, p<.001, \eta_p^2=.277$ ) was found. A subsequent univariate analysis showed a generally higher score for the wish to avoid topics of death and dying in patients ( $F(1,148)=4.623, p=.033, \eta_p^2=.030$ ) than in family members. Moreover, univariate analyses showed a significantly higher score for “I am very afraid of the last period of my/my relative’s life” ( $F(1,148)=42.279, p<.001, \eta_p^2=.223$ ) and for “I am afraid to talk about EOL topics” ( $F(1,148)=7.702, p=.006, \eta_p^2=.050$ ) in family members than in patients. There were no status effects on the reported aspects “Thoughts about death and dying are burdening for me” ( $F(1,148)=1.219, p=.419, \eta_p^2=.004$ ) or “I avoid talking about EOL topics” ( $F(1,148)=.782, p=.378, \eta_p^2=.005$ ). Thus, cancer patients reported a higher tendency to avoid topics of death and dying in general, whereas family members reported higher anxiety scores. The results remained stable after controlling for possible confounders such as age and gender.

### **Evaluation of end-of-life discussions**

Patients and family members were asked if they had spoken about EOL topics and with whom. Results showed that the majority of patients and family members had talked about the last period of life of the patient, but 22.7 per cent of patients 16.7 per cent of family members had not. There were no differences between family members and patients in the distribution of EOL conversations

1  
2  $(\chi^2(4,1)=6.352; p=.174)$ . Most patients and family members had talked about these themes in an  
3 informal context (55.3% and 71.2%). The results are shown in Table 2. Moreover, the majority of  
4 patients found the conversations helpful or very helpful (51.3%) or more or less helpful (30.3%), and  
5 satisfying or very satisfying (49.5%) or more or less satisfying (30.3%). There were no significant  
6 differences for family members  $(\chi^2(4,1)=1.574; p=.814)$  and  $(\chi^2(4,1)=5.228; p=.265)$ . Of the family  
7 members, 48.4 per cent found the conversations helpful or very helpful and 31.8 per cent more or  
8 less helpful, while 53.1 per cent found the conversations satisfying and 34.8 per cent more or less  
9 satisfying. Significant differences were shown regarding the emotional burden of the conversations  
10  $(\chi^2(4,1)=15.160; p=.004)$ , where 26.4 per cent of the family members evaluated the conversations  
11 as burdening or very burdening, and 34 per cent as more or less burdening, while only 9.1 per cent  
12 of the cancer patients evaluated the conversations as burdening or very burdening, and 31.8 per  
13 cent as more or less burdening.

24  
25 \*\*Table 2\*\*

27  
28 \*\*Table 3\*\*

### 30 **Associations between expectations, fears and experiences**

31  
32  
33 Table 3 shows the cross-sectional correlations between the expectations, fears and experiences of  
34 patients and family members. As expected, positive experiences are associated with positive  
35 expectations and negative experiences (burden of the conversation) are associated with negative  
36 expectations and fears.

## 41 **DISCUSSION**

42  
43  
44 The study investigated the expectations and concerns of cancer patients and family members  
45 regarding end-of-life discussions. A large majority of the participants wish to be self-determined  
46 regarding EOL issues and death. Patients and family members corresponded in their wish that they  
47 should decide about EOL care together with physicians. In total, participants reported more positive  
48 than negative expectations of EOL discussions. Importantly, concern about emotionally burdening  
49 the other person with EOL conversations was rated much higher in a family context than with  
50 professionals, even though the emotional relief was expected to be higher in the family context than  
51 in a professional context. Family members reported more fears about the last period of life as well  
52  
53  
54  
55  
56  
57  
58  
59  
60

1  
2 as talking about it, whereas palliative patients tended to avoid the topic of death and dying to a  
3  
4 higher degree than their family members.  
5

6  
7 Similar to the results of other studies [24, 25], we found that three out of four had talked about the  
8  
9 last period of life. We found no significant differences between patients and family members. This  
10  
11 means they engage or fail to engage in EOL talk similarly. Remarkably, 22.6 per cent of the palliative  
12  
13 patients had never spoken to anybody about their end of life; additionally, it is not clear what “rarely”  
14  
15 meant in each individual case. Nevertheless, it is not the frequency of EOL conversations that is most  
16  
17 important, but whether important issues are clarified and decisions made. Maybe it is helpful for  
18  
19 seriously ill persons and their caregivers not to engage all the time in existential topics in the manner  
20  
21 of double awareness [26]. Double awareness is the flexibility of mind between life awareness and  
22  
23 death awareness and the possibility of switching and tolerating the ambivalence of life and death at  
24  
25 the same time [26]. In further research, it would be interesting to investigate whether persons who  
26  
27 discussed death and dying frequently show higher levels of death awareness and persons who have  
28  
29 never had EOL discussions show lower levels of death awareness.

30  
31 However, a significant proportion of patients had not communicated about EOL decisions and a  
32  
33 large proportion of caregivers were not adequately informed. In this light, the difference in  
34  
35 expectations between the informal context and the professional context observed in this study is of  
36  
37 distinct importance.

38  
39 The most notable result is that the interviewed persons expected substantial personal relief when  
40  
41 openly talking about EOL issues in an informal context but expected the other person to be  
42  
43 burdened by such a conversation. Notably, this ‘self-other’ paradox is true for both groups, the  
44  
45 palliative care patients and the relatives. This paradox was not found in the professional context.  
46  
47 On the one hand, persons expect more emotional relief and practical support from conversations  
48  
49 with loved ones, pointing out the importance and high relevance of informal caregivers in the sense  
50  
51 of building a unit of care [27]. On the other hand, concerns about causing negative emotions and  
52  
53 burdening the other person are dramatically higher in the informal than in the professional context.  
54  
55 Emotion-related factors such as protective buffering can be relevant barriers to EOL communication  
56  
57 [4]. The belief that it will hurt the other person to address death and dying seems to be very salient  
58  
59 and a relevant obstacle to EOL conversations. However, in a professional context, this strong barrier  
60  
seems to be remarkably lower. Consequently, it seems to be almost mandatory for professionals to

1  
2 initiate and foster EOL discussions instead of waiting for initiation by the patient. This way the topic  
3  
4 can be placed on a professional level, which might be easier to endure.  
5

6  
7 In total, patients and their family members reported more positive than negative expectations of  
8  
9 EOL discussions. In the light of the high psychological burden of emotional stress and uncertainty  
10  
11 due to the loaded situation, the fact that positive expectations exceeded negative ones seems very  
12  
13 promising. Specifically, expected emotional relief and increased support from these conversations  
14  
15 could serve as motivating factors to initiate EOL conversations. Moreover, the results show that  
16  
17 expectations of experiencing negative emotions are correlated with EOL fears and the tendency to  
18  
19 avoid talking. This is not surprising because avoidance is a very common reaction to fear and is part  
20  
21 of the classification systems of phobias (e.g. thanatophobia) [15]. Therefore, another possible  
22  
23 explanation for the first observation might be that the majority of those who had reservations  
24  
25 towards communication about death and dying did not participate in this study, resulting in a  
26  
27 selective sample. Of the persons who declined to participate, 42.1 per cent did so out of fear of the  
28  
29 emotional burden and 14.5 per cent because the person did not want to talk about this topic. The  
30  
31 high refusal rate seems to be a problem in research on EOL topics. In another study with healthy  
32  
33 participants, a similar phenomenon was found: those with higher scores for death anxiety were  
34  
35 more likely to drop out [28]. In further research, it would be worthwhile finding a way to include  
36  
37 those persons who are afraid and not open to the topic. Maybe extremely short and low-threshold  
38  
39 questionnaires or interviews and short interventions addressing the person's expectations could be  
40  
41 helpful.

42  
43 The result that negative expectations correlated with negative experiences and positive  
44  
45 expectations with positive experiences supports the fact that expectations can develop through  
46  
47 personal experiences (learning) [29]. It can be assumed that there is a vicious circle consisting of a  
48  
49 negative experience leading to negative expectations that again lead to negative experiences in  
50  
51 terms of a nocebo effect [30]. Further research examining the role of expectations in EOL  
52  
53 communication in a longitudinal way might want to address the causal relationship between the  
54  
55 two constructs. In a next step, interventions could be developed that address the optimization of  
56  
57 expectations [31, 32].

58  
59 Interestingly, family members are in some areas even more affected than patients in terms of higher  
60  
61 anxiety levels for both EOL fears and state anxiety. This is in line with the prior findings of Leroy et  
62  
63 al. [33] which show that family members of advanced cancer patients tend to be more anxious than

1 patients, with prevalence levels around 32–72 per cent [34–36]. Family caregivers suffer from high  
2 levels of distress (and emotional burden) and a high level of unmet needs [31]; thus it is relevant to  
3 incorporate dyadic programmes [37]. Alongside the communication about death and dying, other  
4 typical problems experienced by families of advanced cancer patients can include dealing with  
5 feelings of separation and loss, role overload, the need to conceal feelings, feelings of isolation,  
6 fatigue and exhaustion, and feelings of inadequacy regarding necessary skills [38]. Therefore, as a  
7 clinical implication, we suggest that a holistic quality EOL care approach should not only focus on  
8 patients but also provide as much support as possible for family members and close friends .  
9  
10  
11  
12  
13  
14  
15  
16

17 Some limitations must be considered when interpreting the results of this study. Firstly, the items  
18 used in the semi-structured interview in this study were developed by the investigators and were  
19 not based on a validated instrument. Nevertheless, most research in this area has been qualitative,  
20 so this study can be a helpful addition to the existing research. Secondly, the study was cross-  
21 sectional, showing only correlations but no causal associations between expectations, fears and  
22 experiences. It would be worthwhile to evaluate these associations in further studies in a  
23 longitudinal way. Thirdly, most of the family members were female. Further studies with a balanced  
24 gender distribution would be valuable. Finally, due to the high refusal rate, it cannot be excluded  
25 that the results are influenced by selection bias. Thus, the results may cannot be generalised to  
26 other populations. Nevertheless, the fact that many persons refuse the study due to fear of  
27 emotional burden underlines the importance of the topic and the relevance of expectations.  
28  
29  
30  
31  
32  
33  
34  
35  
36  
37

38 To conclude, there seems to exist a 'self-other' paradox: palliative patients and their relatives expect  
39 substantial personal relief when openly talking about end-of-life issues, but also expect the other  
40 person to be burdened by such a conversation. Professionals repeatedly need to initiate end-of-life  
41 conversations to help families speaking about end-of-life issues.  
42  
43  
44  
45  
46  
47  
48  
49  
50  
51  
52  
53  
54  
55  
56  
57  
58  
59  
60

### **Availability of data and materials**

The datasets generated and analysed during the current study are available from the corresponding author upon reasonable request.

### **Ethical approval**

The study was approved by the institutional review board of the Medical School, Philipps-University of Marburg (AZ:47/12). This study was performed in line with the principles of the Declaration of Helsinki.

### **Consent to participate**

Written informed consent was obtained from all individual participants included in the study.

### **Consent for publication**

Participants signed informed consent regarding publishing their data in an anonymous form.

### **Contributors**

All authors have made a substantial contribution to the work through data acquisition, data collection, analysis, interpretation of data, drafting the article, and approving the final version to be published.

### **Funding**

The authors received no funding for this study.

### **Competing interests**

The authors have no conflicts of interest to declare that are relevant to the content of this article.



## REFERENCES

- 1 Wenger NS, Oye RK, Bellamy PE, et al. Prior capacity of patients lacking decision making ability early in hospitalization. *Journal of General Internal Medicine* 1994;9(10):539–43.
- 2 Raymont V, Bingley W, Buchanan A, et al. Prevalence of mental incapacity in medical inpatients and associated risk factors: cross-sectional study. *The Lancet* 2004;364(9443):1421–27.
- 3 Bachner YG, Carmel S. Open communication between caregivers and terminally ill cancer patients: the role of caregivers' characteristics and situational variables. *Health Commun* 2009;24(6):524–31.
- 4 Nagelschmidt K, Leppin N, Seifart C, et al. Systematic mixed-method review of barriers to end-of-life communication in the family context. *BMJ Support Palliat Care* 2020.
- 5 Fried TR, Zenoni M, Iannone L, et al. Assessment of surrogates' knowledge of patients' treatment goals and confidence in their ability to make surrogate treatment decisions. *JAMA Intern Med* 2019;179(2):267–68.
- 6 Yamamoto S, Arao H, Masutani E, et al. Decision making regarding the place of end-of-life cancer care: the burden on bereaved families and related factors. *J Pain Symptom Manage* 2017;53(5):862–70. <http://www.sciencedirect.com/science/article/pii/S088539241730043X>
- 7 Yamaguchi T, Maeda I, Hatano Y, et al. Effects of end-of-life discussions on the mental health of bereaved family members and quality of patient death and care. *J Pain Symptom Manage* 2017;54(1):17-26.e1.
- 8 Wendler D, Rid A. Systematic review: the effect on surrogates of making treatment decisions for others. *Ann Intern Med* 2011;154(5):336–46.
- 9 Rief W, Glombiewski JA, Gollwitzer M, et al. Expectancies as core features of mental disorders. *Curr Opin Psychiatry* 2015;28(5):378–85.
- 10 Laferton JAC, Kube T, Salzmann S, et al. Patients' expectations regarding medical treatment: a critical review of concepts and their assessment. *Front Psychol* 2017;8:233.
- 11 Pan Y, Heisig SR, Blanckenburg P von, et al. Facilitating adherence to endocrine therapy in breast cancer: stability and predictive power of treatment expectations in a 2-year prospective study. *Breast Cancer Res Treat* 2018;168(3):667–77.
- 12 Have M ten, de Graaf R, Ormel J, et al. Are attitudes towards mental health help-seeking associated with service use? Results from the European Study of Epidemiology of Mental Disorders. *Soc Psychiatry Psychiatr Epidemiol* 2010;45(2):153–63.

- 1  
2 13 Lee T, Cui J, Rosario H, et al. Assessment of caregiver expectations of physician communication  
3 in a pediatric setting. *BMC Health Serv Res* 2020;20(1):408.  
4  
5 14 Fava GA, Cosci F, Sonino N. Current psychosomatic practice. *Psychother Psychosom*  
6 2017;86(1):13–30.  
7  
8 15 Grassi L, Sabato S, Rossi E, et al. Use of the diagnostic criteria for psychosomatic research in  
9 oncology. *Psychother Psychosom* 2005;74(2):100–07.  
10  
11 16 Soleimani MA, Bahrami N, Allen K-A, et al. Death anxiety in patients with cancer: a systematic  
12 review and meta-analysis. *European Journal of Oncology Nursing* 2020:101803.  
13  
14 17 Gonen G, Kaymak SU, Cankurtaran ES, et al. The factors contributing to death anxiety in cancer  
15 patients. *Journal of Psychosocial Oncology* 2012;30(3):347–58.  
16  
17 18 Neel C, Lo C, Rydall A, et al. Determinants of death anxiety in patients with advanced cancer.  
18 *BMJ Support Palliat Care* 2015;5(4):373–80. doi:10.1136/bmjspcare-2012-000420 [published  
19 online first: 22 August 2013].  
20  
21 19 Sinoff G. Thanatophobia (death anxiety) in the elderly: the problem of the child's inability to  
22 assess their own parent's death anxiety state. *Frontiers in Medicine* 2017;4:11.  
23 <https://www.frontiersin.org/article/10.3389/fmed.2017.00011>  
24  
25 20 Neimeyer RA, Wittkowski J, Moser R. Psychological research on death attitudes: an overview  
26 and evaluation. *Death Studies* 2004;28(4):309–40.  
27  
28 21 McGrath P. Affirming the connection: comparative findings on communication issues from  
29 hospice patients and hematology survivors. *Death Studies* 2004;28(9):829–48.  
30  
31 22 Tong E, Deckert A, Gani N, et al. The meaning of self-reported death anxiety in advanced cancer.  
32 *Palliat Med* 2016;30(8):772–79.  
33  
34 23 Zigmund AS, Snaith RP. The Hospital Anxiety and Depression Scale. *Acta Psychiatrica*  
35 *Scandinavica* 1983;67(6):361–70.  
36  
37 24 Mack JW, Weeks JC, Wright AA, et al. End-of-life discussions, goal attainment, and distress at  
38 the end of life: predictors and outcomes of receipt of care consistent with preferences. *J Clin*  
39 *Oncol* 2010;28(7):1203–08.  
40  
41 25 Wright AA, Zhang B, Ray A, et al. Associations between end-of-life discussions, patient mental  
42 health, medical care near death, and caregiver bereavement adjustment. *JAMA*  
43 2008;300(14):1665–73.  
44  
45 26 Colosimo K, Nissim R, Pos AE, et al. 'Double awareness' in psychotherapy for patients living  
46 with advanced cancer. *Journal of Psychotherapy Integration* 2018;28(2):125–40.  
47  
48  
49  
50  
51  
52  
53  
54  
55  
56  
57  
58  
59  
60

- 1  
2 27 Connor SR. *Hospice and Palliative Care: The Essential Guide*. New York, NY: Taylor & Francis  
3 2017.  
4  
5 28 Blanckenburg P von, Leppin N, Nagelschmidt K, et al. Matters of life and death: an experimental  
6 study investigating psychological interventions to encourage the readiness for end-of-life  
7 conversations. *Psychother Psychosom* 2020. [https://www.karger.com/DOI/10.1159/  
8 000511199](https://www.karger.com/DOI/10.1159/000511199)  
9  
10 29 Petrie KJ, Rief W. Psychobiological mechanisms of placebo and nocebo effects: pathways to  
11 improve treatments and reduce side effects. *Annu Rev Psychol* 2019:599–625.  
12 doi:10.1146/annurev-psych-010418-102907 [published online first: 15 August 2018].  
13  
14 30 Colloca L, Barsky AJ. Placebo and nocebo effects. *N Engl J Med* 2020;382(6):554–61.  
15  
16 31 Blanckenburg P von, Schuricht F, Albert U-S, et al. Optimizing expectations to prevent side  
17 effects and enhance quality of life in breast cancer patients undergoing endocrine therapy:  
18 study protocol of a randomized controlled trial. *BMC Cancer* 2013;13:426.  
19  
20 32 Shedden-Mora MC, Pan Y, Heisig SR, et al. Optimizing expectations about endocrine treatment  
21 for breast cancer: results of the randomized controlled PSY-BREAST trial. *Clinical Psychology in  
22 Europe* 2020;2(1):1–20.  
23  
24 33 Leroy T, Fournier E, Penel N, et al. Crossed views of burden and emotional distress of cancer  
25 patients and family caregivers during palliative care. *Psychooncology* 2016;25(11):1278–85.  
26 doi:10.1002/pon.4056 [published online first: 3 December 2015].  
27  
28 34 Götze H, Brähler E, Gansera L, et al. Psychological distress and quality of life of palliative cancer  
29 patients and their caring relatives during home care. *Support Care Cancer* 2014;22(10):2775–  
30 82. doi:10.1007/s00520-014-2257-5 [published online first: 9 May 2014].  
31  
32 35 Grunfeld E, Coyle D, Whelan T, et al. Family caregiver burden: results of a longitudinal study of  
33 breast cancer patients and their principal caregivers. *CMAJ* 2004;170(12):1795–801.  
34  
35 36 Oechsle K. Current advances in palliative and hospice care: problems and needs of relatives  
36 and family caregivers during palliative and hospice care. An overview of current literature. *Med  
37 Sci (Basel)* 2019;7(3).  
38  
39 37 Northouse LL, Mood DW, Schafenacker A, et al. Randomized clinical trial of a brief and  
40 extensive dyadic intervention for advanced cancer patients and their family caregivers.  
41 *Psychooncology* 2013;22(3):555–63. doi:10.1002/pon.3036 [published online first: 31 January  
42 2012].  
43  
44 38 Sales E. Family burden and quality of life. *Qual Life Res* 2003;12(1):33–41.  
45  
46  
47  
48  
49  
50  
51  
52  
53  
54  
55  
56  
57  
58  
59  
60

1  
2 **Figure legends**  
3

4  
5 Figure 1. Persons who should decide about end-of-life care  
6

7 Figure 2. Expectations of end-of-life discussions among cancer patients and family members in an informal versus a  
8 professional context  
9

10  
11 Figure 3. End-of-life fears among cancer patients and family members  
12  
13  
14  
15  
16  
17  
18  
19  
20  
21  
22  
23  
24  
25  
26  
27  
28  
29  
30  
31  
32  
33  
34  
35  
36  
37  
38  
39  
40  
41  
42  
43  
44  
45  
46  
47  
48  
49  
50  
51  
52  
53  
54  
55  
56  
57  
58  
59  
60

For peer review only

Table 1. Sociodemographic and medical data of the study sample

| Variables            |                                    | Patients (N=85) | Family Members (N=66) | Group Differences     |
|----------------------|------------------------------------|-----------------|-----------------------|-----------------------|
|                      |                                    | N (%) / M (SD)  | N (%) / M (SD)        | t- / $\chi^2$ - Value |
| Age in years         |                                    | 62.8 (11.4)     | 56.3 (12.7)           | 3.24, $p$ =.002       |
| Gender (male)        |                                    | 56 (65.9%)      | 19 (28.8%)            | 20.45, $p$ <.001      |
| Years of education   | 9                                  | 52 (61.2%)      | 33 (50%)              | 3.442, $p$ =.328      |
|                      | 10                                 | 15 (17.9%)      | 18 (27.3%)            |                       |
|                      | 12-13                              | 16 (18.8%)      | 15 (22.7%)            |                       |
| Working Status       | Working                            | 4 (4.8 %)       | 39 (59.1%)            | 64.85, $p$ <.001      |
|                      | Disability pension                 | 16 (18.8 %)     | 3 (4.7%)              |                       |
|                      | Pension                            | 37 (43.5 %)     | 15 (23.4 %)           |                       |
|                      | On sick leave                      | 21 (24.7 %)     | 1 (1.6 %)             |                       |
|                      | Unemployed                         | 1 (1.2 %)       | 3 (4.7 %)             |                       |
|                      | Housewife/man                      | 5 (5.9 %)       | 3 (4.7 %)             |                       |
| Family Status        | Married                            | 53 (62.4 %)     | 48 (72.7%)            | 9.278. $p$ =.026      |
|                      | Divorced                           | 14 (16.5 %)     | 3 (4.5%)              |                       |
|                      | Single                             | 7 (8.2 %)       | 11 (16.7%)            |                       |
|                      | Widowed                            | 11 (12.9 %)     | 4 (6.1%)              |                       |
|                      | Living together with partner (yes) | 62 (72.9 %)     | 55 (83.3%)            |                       |
|                      | Children (yes)                     | 73 (85.9 %)     | 53 (80.3%)            |                       |
| Religious Confession | Catholic                           | 15 (17.6 %)     | 11 (16.7 %)           | 1.244, $p$ =.742      |
|                      | Protestant                         | 55 (64.7 %)     | 45 (68.2 %)           |                       |
|                      | Other                              | 2 (2.4 %)       | 3 (4.5 %)             |                       |
|                      | None                               | 13 (15.4 %)     | 7 (10.6 %)            |                       |
| Relation to Patient  | Partner                            |                 | 44 (66.7 %)           |                       |
|                      | Son/ Daughter                      |                 | 15 (22.7 %)           |                       |
|                      | Parent                             |                 | 1 (1.5 %)             |                       |
|                      | Other                              |                 | 6 (9.1 %)             |                       |
| Tumor group          | Lungs                              | 25 (29.4 %)     |                       |                       |
|                      | Gastro-intestinal                  | 14 (16.5 %)     |                       |                       |
|                      | Hepatobiliary                      | 3 (3.5 %)       |                       |                       |
|                      | Urogenital                         | 8 (9.4 %)       |                       |                       |
|                      | Gynecological                      | 7 (8.2 %)       |                       |                       |
|                      | ENT (ear, nose, throat)            | 2 (2.4 %)       |                       |                       |

|    |                 |                                 |             |                  |
|----|-----------------|---------------------------------|-------------|------------------|
| 1  |                 |                                 |             |                  |
| 2  |                 | Brain tumor/<br>Medulloblastome | 4 (4.7 %)   |                  |
| 3  |                 |                                 |             |                  |
| 4  |                 |                                 |             |                  |
| 5  |                 | Haematological                  | 10 (11.8 %) |                  |
| 6  |                 |                                 |             |                  |
| 7  |                 | Other                           | 12 (14.1 %) |                  |
| 8  | Treatment       | Chemotherapy                    | 72 (84.7 %) | -                |
| 9  |                 | Radiation                       | 49 (57.6 %) | -                |
| 10 |                 | Surgery                         | 43 (50.6 %) | -                |
| 11 |                 |                                 |             |                  |
| 12 |                 |                                 |             |                  |
| 13 | HADS Depression |                                 | 5.64 (3.21) | 6.67 (3.09)      |
| 14 |                 |                                 |             | -1.971, $p=.051$ |
| 15 | HADS Anxiety    |                                 | 5.83 (3.49) | 8.97 (3.63)      |
| 16 |                 |                                 |             | -5.368, $p<.001$ |
| 17 |                 |                                 |             |                  |
| 18 |                 |                                 |             |                  |
| 19 |                 |                                 |             |                  |
| 20 |                 |                                 |             |                  |
| 21 |                 |                                 |             |                  |
| 22 |                 |                                 |             |                  |
| 23 |                 |                                 |             |                  |
| 24 |                 |                                 |             |                  |
| 25 |                 |                                 |             |                  |
| 26 |                 |                                 |             |                  |
| 27 |                 |                                 |             |                  |
| 28 |                 |                                 |             |                  |
| 29 |                 |                                 |             |                  |
| 30 |                 |                                 |             |                  |
| 31 |                 |                                 |             |                  |
| 32 |                 |                                 |             |                  |
| 33 |                 |                                 |             |                  |
| 34 |                 |                                 |             |                  |
| 35 |                 |                                 |             |                  |
| 36 |                 |                                 |             |                  |
| 37 |                 |                                 |             |                  |
| 38 |                 |                                 |             |                  |
| 39 |                 |                                 |             |                  |
| 40 |                 |                                 |             |                  |
| 41 |                 |                                 |             |                  |
| 42 |                 |                                 |             |                  |
| 43 |                 |                                 |             |                  |
| 44 |                 |                                 |             |                  |
| 45 |                 |                                 |             |                  |
| 46 |                 |                                 |             |                  |
| 47 |                 |                                 |             |                  |
| 48 |                 |                                 |             |                  |
| 49 |                 |                                 |             |                  |
| 50 |                 |                                 |             |                  |
| 51 |                 |                                 |             |                  |
| 52 |                 |                                 |             |                  |
| 53 |                 |                                 |             |                  |
| 54 |                 |                                 |             |                  |
| 55 |                 |                                 |             |                  |
| 56 |                 |                                 |             |                  |
| 57 |                 |                                 |             |                  |
| 58 |                 |                                 |             |                  |
| 59 |                 |                                 |             |                  |
| 60 |                 |                                 |             |                  |

For peer review only

**Table 2.** Conversational partner in end-of-life discussions

| <b>End-of-life communication</b>                                                 |                          | <b>Patients<br/>(n=84)</b> | <b>Family<br/>members<br/>(n=65)</b> |
|----------------------------------------------------------------------------------|--------------------------|----------------------------|--------------------------------------|
| <b>Have you<br/>spoken about<br/>(your/his/her)<br/>last period-of<br/>life?</b> | A lot                    | 3 (3.5%)                   | 5 (7.6%)                             |
|                                                                                  | Frequently               | 10 (11.8%)                 | 16 (24.4%)                           |
|                                                                                  | From time to time        | 31 (36.5%)                 | 22 (33.3%)                           |
|                                                                                  | Rarely                   | 21 (24.7%)                 | 11 (16.7%)                           |
|                                                                                  | Never                    | 19 (22.4%)                 | 11 (16.7%)                           |
| <b>Professional<br/>Context</b>                                                  | Physician                | 26 (30.6%)                 | 25 (37.9%)                           |
|                                                                                  | Nurse                    | 2 (2.4%)                   | 7 (10.6%)                            |
|                                                                                  | Pastor                   | 10 (11.8%)                 | 4 (6.1%)                             |
|                                                                                  | Psychologist             | 4 (4.7%)                   | 5 (7.6%)                             |
| <b>Informal<br/>Context</b>                                                      | Family                   | 47 (55.3%)                 | 47 (71.2%)                           |
|                                                                                  | Partner                  | 45 (52.9%)                 | 43 (65.2%)                           |
|                                                                                  | Friends                  | 30 (35.3%)                 | 30 (55.6%)                           |
|                                                                                  | Other patients           | 5 (5.9%)                   | 10 (15.2)                            |
|                                                                                  | With the patient himself | -                          | 45 (68.2%)                           |

**Table 3.** Correlations between the expectations, fears and experiences in patients and family members

|                                        | 1             | 2             | 3             | 4             | 5             | 6             | 7              | 8             | 9             | 10            | 11             | 12             | 13            |
|----------------------------------------|---------------|---------------|---------------|---------------|---------------|---------------|----------------|---------------|---------------|---------------|----------------|----------------|---------------|
| <b>EXPECTATIONS</b>                    |               |               |               |               |               |               |                |               |               |               |                |                |               |
| 1 Emotional relief                     | -             |               |               |               |               |               |                |               |               |               |                |                |               |
| 2 Practical support                    | <b>.777**</b> | -             |               |               |               |               |                |               |               |               |                |                |               |
| 3 Negative emotions                    | .099          | -.008         | -             |               |               |               |                |               |               |               |                |                |               |
| 4 Refusal                              | -.046         | -.150         | <b>.344**</b> | -             |               |               |                |               |               |               |                |                |               |
| 5 My wishes not to be respected        | -.072         | <b>-.175*</b> | <b>.173*</b>  | <b>.645**</b> | -             |               |                |               |               |               |                |                |               |
| 6 Emotional burden of the other person | .024          | .039          | <b>.441**</b> | <b>.166*</b>  | <b>.175*</b>  | -             |                |               |               |               |                |                |               |
| <b>FEARS</b>                           |               |               |               |               |               |               |                |               |               |               |                |                |               |
| 7 Avoidance of the topic               | -.066         | -.85          | .090          | -.063         | .017          | 0.64          | -              |               |               |               |                |                |               |
| 8 Thoughts are burdening               | .045          | -.044         | <b>.375**</b> | .064          | .079          | <b>.286**</b> | <b>.376**</b>  | -             |               |               |                |                |               |
| 9 Very afraid of EOL                   | .136          | -.015         | <b>.383**</b> | .129          | .036          | <b>.187*</b>  | .029           | <b>.387**</b> | -             |               |                |                |               |
| 10 Afraid of Talking                   | .096          | .040          | <b>.502**</b> | <b>.240**</b> | .162*         | .210          | .139           | <b>.280**</b> | <b>.465**</b> | -             |                |                |               |
| 11 Avoidance of Talking                | .013          | .036          | <b>.256**</b> | .138          | .100          | <b>.222**</b> | <b>.374**</b>  | <b>.348**</b> | <b>.168*</b>  | <b>.516**</b> | -              |                |               |
| <b>EXPERIENCES</b>                     |               |               |               |               |               |               |                |               |               |               |                |                |               |
| 12 burdening                           | -.005         | -.102         | <b>.499**</b> | <b>.302**</b> | .177          | <b>.232*</b>  | .017           | <b>.382**</b> | <b>.478**</b> | <b>.438**</b> | <b>.209*</b>   | -              |               |
| 13 helpful                             | <b>.362**</b> | <b>.320**</b> | -.104         | -.127         | -.111         | .061          | <b>-.331**</b> | -.130         | .012          | <b>-.232*</b> | <b>-.316**</b> | <b>-.247**</b> | -             |
| 14 satisfied                           | <b>.232*</b>  | <b>.211*</b>  | -.156         | <b>-.183*</b> | <b>-.203*</b> | -.049         | -.129          | -.048         | -.048         | -.081         | -.053          | <b>-.419**</b> | <b>.506**</b> |

Note. \*p<.05, \*\*p<.01, (n=118-151)



1  
2  
3  
4  
5  
6  
7  
8  
9  
10  
11  
12  
13  
14  
15  
16  
17  
18  
19  
20  
21  
22  
23  
24  
25  
26  
27  
28  
29  
30  
31  
32  
33  
34  
35  
36  
37  
38  
39  
40  
41  
42  
43  
44  
45  
46  
47  
48  
49  
50  
51  
52  
53  
54  
55  
56  
57  
58  
59  
60

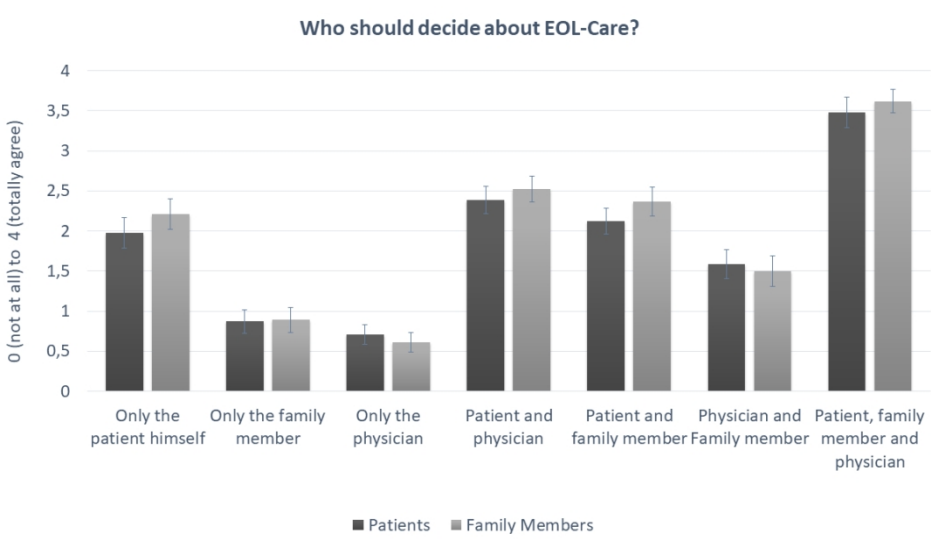

855x481mm (38 x 38 DPI)

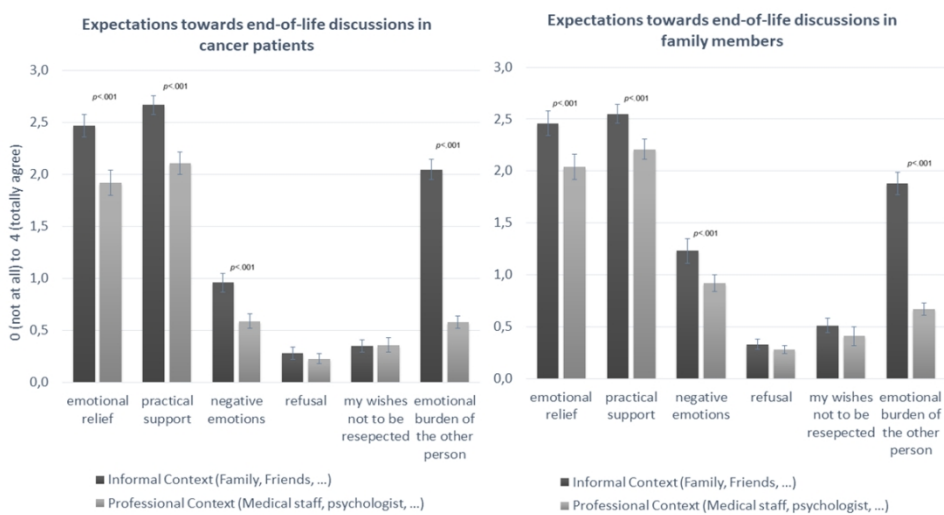

855x481mm (38 x 38 DPI)

1  
2  
3  
4  
5  
6  
7  
8  
9  
10  
11  
12  
13  
14  
15  
16  
17  
18  
19  
20  
21  
22  
23  
24  
25  
26  
27  
28  
29  
30  
31  
32  
33  
34  
35  
36  
37  
38  
39  
40  
41  
42  
43  
44  
45  
46  
47  
48  
49  
50  
51  
52  
53  
54  
55  
56  
57  
58  
59  
60

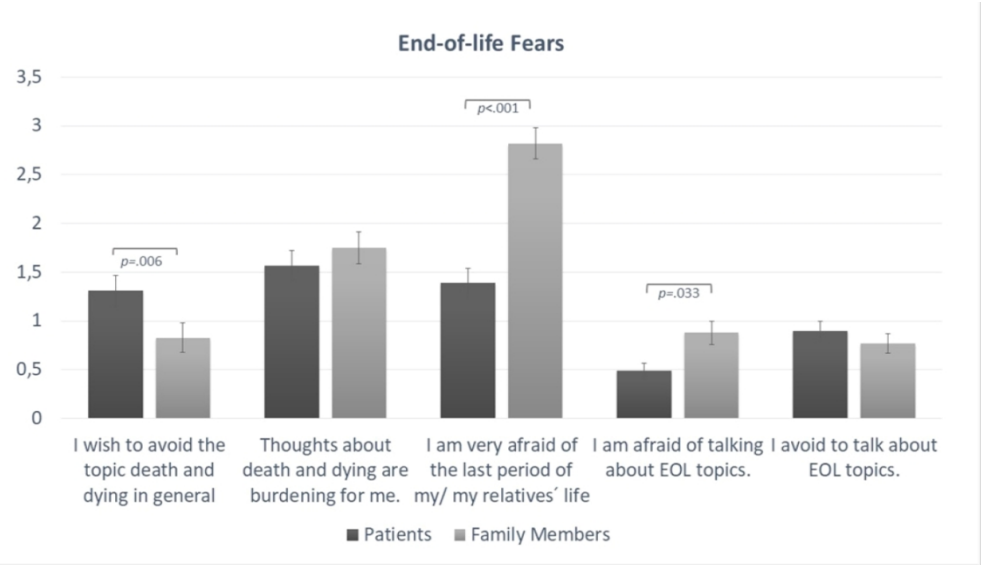

855x481mm (38 x 38 DPI)

STROBE Statement—Checklist of items that should be included in reports of *cohort studies*

|                              | Item No | Recommendation                                                                                                                                                                                                                                                                                                         | Page No |
|------------------------------|---------|------------------------------------------------------------------------------------------------------------------------------------------------------------------------------------------------------------------------------------------------------------------------------------------------------------------------|---------|
| <b>Title and abstract</b>    | 1       | (a) Indicate the study's design with a commonly used term in the title or the abstract<br>(b) Provide in the abstract an informative and balanced summary of what was done and what was found                                                                                                                          | 3<br>3  |
| <b>Introduction</b>          |         |                                                                                                                                                                                                                                                                                                                        |         |
| Background/rationale         | 2       | Explain the scientific background and rationale for the investigation being reported                                                                                                                                                                                                                                   | 4f      |
| Objectives                   | 3       | State specific objectives, including any prespecified hypotheses                                                                                                                                                                                                                                                       | 5       |
| <b>Methods</b>               |         |                                                                                                                                                                                                                                                                                                                        |         |
| Study design                 | 4       | Present key elements of study design early in the paper                                                                                                                                                                                                                                                                | 5       |
| Setting                      | 5       | Describe the setting, locations, and relevant dates, including periods of recruitment, exposure, follow-up, and data collection                                                                                                                                                                                        | 5       |
| Participants                 | 6       | (a) Give the eligibility criteria, and the sources and methods of selection of participants. Describe methods of follow-up<br>(b) For matched studies, give matching criteria and number of exposed and unexposed                                                                                                      | 5       |
| Variables                    | 7       | Clearly define all outcomes, exposures, predictors, potential confounders, and effect modifiers. Give diagnostic criteria, if applicable                                                                                                                                                                               | 5f      |
| Data sources/<br>measurement | 8*      | For each variable of interest, give sources of data and details of methods of assessment (measurement). Describe comparability of assessment methods if there is more than one group                                                                                                                                   | 5       |
| Bias                         | 9       | Describe any efforts to address potential sources of bias                                                                                                                                                                                                                                                              | 6       |
| Study size                   | 10      | Explain how the study size was arrived at                                                                                                                                                                                                                                                                              | 6       |
| Quantitative variables       | 11      | Explain how quantitative variables were handled in the analyses. If applicable, describe which groupings were chosen and why                                                                                                                                                                                           | 6       |
| Statistical methods          | 12      | (a) Describe all statistical methods, including those used to control for confounding<br>(b) Describe any methods used to examine subgroups and interactions<br>(c) Explain how missing data were addressed<br>(d) If applicable, explain how loss to follow-up was addressed<br>(e) Describe any sensitivity analyses | 6       |
| <b>Results</b>               |         |                                                                                                                                                                                                                                                                                                                        |         |
| Participants                 | 13*     | (a) Report numbers of individuals at each stage of study—eg numbers potentially eligible, examined for eligibility, confirmed eligible, included in the study, completing follow-up, and analysed<br>(b) Give reasons for non-participation at each stage<br>(c) Consider use of a flow diagram                        | 6       |
| Descriptive data             | 14*     | (a) Give characteristics of study participants (eg demographic, clinical, social) and information on exposures and potential confounders<br>(b) Indicate number of participants with missing data for each variable of interest<br>(c) Summarise follow-up time (eg, average and total amount)                         | Table 1 |
| Outcome data                 | 15*     | Report numbers of outcome events or summary measures over time                                                                                                                                                                                                                                                         | 7ff     |

|    |                          |    |                                                                                                                                                                                                              |                           |
|----|--------------------------|----|--------------------------------------------------------------------------------------------------------------------------------------------------------------------------------------------------------------|---------------------------|
| 1  | Main results             | 16 | (a) Give unadjusted estimates and, if applicable, confounder-adjusted estimates and their precision (eg, 95% confidence interval). Make clear which confounders were adjusted for and why they were included | 6-9, Table 2, and Figures |
| 2  |                          |    |                                                                                                                                                                                                              |                           |
| 3  |                          |    | (b) Report category boundaries when continuous variables were categorized                                                                                                                                    |                           |
| 4  |                          |    | (c) If relevant, consider translating estimates of relative risk into absolute risk for a meaningful time period                                                                                             |                           |
| 5  | Other analyses           | 17 | Report other analyses done—eg analyses of subgroups and interactions, and sensitivity analyses                                                                                                               | Table 3                   |
| 6  | <b>Discussion</b>        |    |                                                                                                                                                                                                              |                           |
| 7  | Key results              | 18 | Summarise key results with reference to study objectives                                                                                                                                                     | 9                         |
| 8  | Limitations              | 19 | Discuss limitations of the study, taking into account sources of potential bias or imprecision. Discuss both direction and magnitude of any potential bias                                                   | 12                        |
| 9  | Interpretation           | 20 | Give a cautious overall interpretation of results considering objectives, limitations, multiplicity of analyses, results from similar studies, and other relevant evidence                                   | 9-12                      |
| 10 | Generalisability         | 21 | Discuss the generalisability (external validity) of the study results                                                                                                                                        | 12                        |
| 11 | <b>Other information</b> |    |                                                                                                                                                                                                              |                           |
| 12 | Funding                  | 22 | Give the source of funding and the role of the funders for the present study and, if applicable, for the original study on which the present article is based                                                | 13                        |

26 \*Give information separately for exposed and unexposed groups.

27  
28  
29 **Note:** An Explanation and Elaboration article discusses each checklist item and gives methodological background and published examples of transparent reporting. The STROBE checklist is best used in conjunction with this article (freely available on the Web sites of PLoS Medicine at <http://www.plosmedicine.org/>, Annals of Internal Medicine at <http://www.annals.org/>, and Epidemiology at <http://www.epidem.com/>). Information on the STROBE Initiative is available at <http://www.strobe-statement.org>.

# BMJ Open

## Expectations, end-of-life fears and end-of-life communication among palliative cancer patients and caregivers: a cross-sectional study

|                                 |                                                                                                                                                                                                                                                                                                                                                                                                                                                                                                                                                                                                                                                                                                                                                                                                                                                                                                                            |
|---------------------------------|----------------------------------------------------------------------------------------------------------------------------------------------------------------------------------------------------------------------------------------------------------------------------------------------------------------------------------------------------------------------------------------------------------------------------------------------------------------------------------------------------------------------------------------------------------------------------------------------------------------------------------------------------------------------------------------------------------------------------------------------------------------------------------------------------------------------------------------------------------------------------------------------------------------------------|
| Journal:                        | <i>BMJ Open</i>                                                                                                                                                                                                                                                                                                                                                                                                                                                                                                                                                                                                                                                                                                                                                                                                                                                                                                            |
| Manuscript ID                   | bmjopen-2021-058531.R1                                                                                                                                                                                                                                                                                                                                                                                                                                                                                                                                                                                                                                                                                                                                                                                                                                                                                                     |
| Article Type:                   | Original research                                                                                                                                                                                                                                                                                                                                                                                                                                                                                                                                                                                                                                                                                                                                                                                                                                                                                                          |
| Date Submitted by the Author:   | 16-Feb-2022                                                                                                                                                                                                                                                                                                                                                                                                                                                                                                                                                                                                                                                                                                                                                                                                                                                                                                                |
| Complete List of Authors:       | Von Blanckenburg, Pia; Philipps-Universität Marburg, Clinical Psychology and Psychotherapy<br>Riera Knorrenschild, Jorge; Philipps-Universität Marburg Fachbereich Medizin, Department of Internal Medicine, Div. Haematology and Oncology<br>Hofmann, Mareike; Philipps-Universität Marburg, Department of Clinical Psychology and Psychotherapy<br>Fries, Hansjakob; University Hospital Bonn, Department of Internal Medicine III - Oncology, Hematology and Rheumatology<br>Nestoriuc, Yvonne; Helmut-Schmidt-University / University of the Armed Forces Hamburg, Department of Clinical Psychology; University Medical Center Hamburg-Eppendorf, Department of Systems Neuroscience<br>Seifart, Ulf; Rehabilitation clinic Sonnenblick<br>Rief, Winfried; Philipps-Universität Marburg, Department of Clinical Psychology and Psychotherapy<br>Seifart, Carola; Philipps-Universität Marburg, Department of Medicine |
| <b>Primary Subject Heading</b>: | Communication                                                                                                                                                                                                                                                                                                                                                                                                                                                                                                                                                                                                                                                                                                                                                                                                                                                                                                              |
| Secondary Subject Heading:      | Oncology, Patient-centred medicine, Palliative care                                                                                                                                                                                                                                                                                                                                                                                                                                                                                                                                                                                                                                                                                                                                                                                                                                                                        |
| Keywords:                       | ONCOLOGY, Quality in health care < HEALTH SERVICES ADMINISTRATION & MANAGEMENT, Adult palliative care < PALLIATIVE CARE                                                                                                                                                                                                                                                                                                                                                                                                                                                                                                                                                                                                                                                                                                                                                                                                    |
|                                 |                                                                                                                                                                                                                                                                                                                                                                                                                                                                                                                                                                                                                                                                                                                                                                                                                                                                                                                            |

SCHOLARONE™  
Manuscripts



I, the Submitting Author has the right to grant and does grant on behalf of all authors of the Work (as defined in the below author licence), an exclusive licence and/or a non-exclusive licence for contributions from authors who are: i) UK Crown employees; ii) where BMJ has agreed a CC-BY licence shall apply, and/or iii) in accordance with the terms applicable for US Federal Government officers or employees acting as part of their official duties; on a worldwide, perpetual, irrevocable, royalty-free basis to BMJ Publishing Group Ltd ("BMJ") its licensees and where the relevant Journal is co-owned by BMJ to the co-owners of the Journal, to publish the Work in this journal and any other BMJ products and to exploit all rights, as set out in our [licence](#).

The Submitting Author accepts and understands that any supply made under these terms is made by BMJ to the Submitting Author unless you are acting as an employee on behalf of your employer or a postgraduate student of an affiliated institution which is paying any applicable article publishing charge ("APC") for Open Access articles. Where the Submitting Author wishes to make the Work available on an Open Access basis (and intends to pay the relevant APC), the terms of reuse of such Open Access shall be governed by a Creative Commons licence – details of these licences and which [Creative Commons](#) licence will apply to this Work are set out in our licence referred to above.

Other than as permitted in any relevant BMJ Author's Self Archiving Policies, I confirm this Work has not been accepted for publication elsewhere, is not being considered for publication elsewhere and does not duplicate material already published. I confirm all authors consent to publication of this Work and authorise the granting of this licence.

1  
2  
3  
4 **Title:** Expectations, end-of-life fears and end-of-life communication  
5  
6  
7 among palliative cancer patients and caregivers: a cross-sectional study  
8  
9

10  
11 von Blanckenburg, Pia,<sup>1</sup> Riera Knorrenschild, Jorge,<sup>2</sup> Hofmann, Mareike,<sup>1</sup> Fries, Hansjakob,<sup>3</sup>  
12 Nestoriuc, Yvonne,<sup>4,5</sup> Seifart, Ulf,<sup>6</sup> Rief, Winfried,<sup>1</sup> Seifart, Carola<sup>7</sup>  
13  
14

15  
16 **Corresponding author:**

17 Dr. Pia von Blanckenburg  
18 Department of Clinical Psychology and Psychotherapy  
19 Philipps-University of Marburg Gutenbergstr. 18, 35032 Marburg  
20 eMail: blanckep@staff.uni-marburg.de  
21 Phone: 0049 6421 2824951  
22  
23

24  
25 <sup>1</sup> Department of Clinical Psychology and Psychotherapy, Philipps-University of Marburg, Marburg,  
26 Germany  
27

28 <sup>2</sup> Department of Internal Medicine, Div. Haematology and Oncology, Philipps-University of Marburg,  
29 Marburg, Germany  
30

31 <sup>3</sup> Department of Internal Medicine III - Oncology, Hematology and Rheumatology, University  
32 Hospital Bonn, Bonn, Germany  
33

34 <sup>4</sup> Department of Clinical Psychology, Helmut-Schmidt-University, University of the Federal Armed  
35 Forces Hamburg, Germany  
36

37 <sup>5</sup> Department of Systems Neuroscience, University Medical Centre Hamburg-Eppendorf, Hamburg,  
38 Germany  
39

40 <sup>6</sup> Rehabilitation clinic Sonnenblick, Marburg, Germany  
41

42 <sup>7</sup> Faculty of Medicine, Research Group Medical Ethics (AGEM), Philipps-University of Marburg,  
43 Marburg, Germany  
44  
45  
46  
47  
48  
49

50 **Keywords:** end of life, communication, caregiver, palliative care  
51  
52  
53  
54

55 **Word count:** 3887 words (not including abstract, tables, figure legends and references)  
56  
57  
58  
59  
60



## Strengths and limitations of this study

- In contrast to earlier research, expectations and concerns towards end-of-life discussions were investigated quantitatively in palliative patients and caregivers
- Differences between patients and caregivers were analysed using multivariate analysis
- The cross-sectional design cannot analyse causal relations – further longitudinal research is needed.

For peer review only

**ABSTRACT**

**Objectives** During serious illness, open communication with caregivers can ensure high quality care. Without end-of-life communication, caregivers may become surrogates and decision-makers without knowing the patient's preferences. However, expectations and fears may influence the initiation of communication. The present study investigates differences between palliative cancer patients and caregivers regarding expectations of end-of-life communication, end-of-life fears, and experiences with end-of-life communication.

**Design** A cross-sectional study using a semi-structured interview and a paper-based questionnaire

**Setting** University Hospital in Germany

**Participants** 151 participants: 85 palliative cancer patients (mean age: 62.8 years, 65.9% male) and 66 caregivers (mean age: 56.3 years, 28.8% male)

**Primary and secondary outcome measures** Expectations, end-of-life fears, and experiences of end-of-life discussions

**Results** Patients and caregivers wish for the patient to be self-determined. In general, participants reported more positive than negative expectations of end-of-life discussions. Importantly, concerns about emotionally burdening other person was rated much higher in an informal context than a professional context ( $F(1,149)=316,958, p<.001, \eta^2=.680$ ), even though the emotional relief was expected to be higher ( $F(1,149)=46.115, p<.001, \eta^2=.236$ ). Caregivers reported more fears about the last period of life and more fears about end-of-life discussions than palliative patients, whereas palliative patients tended to avoid the topics of death and dying to a greater extent.

**Conclusions** There seems to exist a 'self-other' asymmetry: palliative patients and their caregivers expect substantial personal relief when openly talking about end-of-life issues, but also expect the other person to be burdened by such communication. Professionals repeatedly need to initiate end-of-life communication.

## INTRODUCTION

In palliative care, patients with a life-threatening disease and their caregivers are perceived as “unit of care”, meaning that both parts are the focus of a care plan [1]. Caregivers can be relatives or significant others. During the course of illness, there is often a moment when the responsibility for medical decisions shifts from the patient to the caregiver due to patient’s poor condition [2, 3]. However, research shows, that caregivers are often not well prepared for these decisions. In one study, only 21 percent of the relatives were aware of patients’ preferences regarding possible EOL situations, although 75 percent rated themselves confident about knowing patients’ goals [4].

Open end-of-life (EOL) communication between the patient and the caregiver can improve the quality of end-of-life care. It can ensure that decisions made are consistent with the patient’s values and wishes. EOL communication is defined as “a clinical interaction, which includes discussion of death and dying as part of the progression of illness or a potential outcome despite treatment efforts” [5]. In a broader sense, EOL communication can include topics around death and dying such as patient’s wishes about medical treatment (e.g. wished treatment options), but also emotional, spiritual and organizational aspects (e.g. funeral, last will or the wished place of dying) [6]. Not knowing patients’ wishes can lead to emotional burden and distress in surrogates [7, 8]. The prevalence of depression and complicated grief was shown to be higher in bereaved families without EOL communication [9], which highlights the importance of those discussions.

However, patients and their caregivers seem to avoid EOL communication [10, 11]. Many challenges are known that discourage them from talking about EOL issues: the patient-caregiver relationship (e.g. differences in values or opinions), a lack of communication skills (e.g. not knowing how to talk about EOL care) or external circumstances (e.g. not having any close person to talk to) [11]. Important barriers on a cognitive level can be expectations towards the communication process (e.g. talking about death speeds up the process of dying) [11]. Expectations are specific and flexible cognitions that 1) are future-oriented and 2) concentrate on whether or not an event or an experience will occur [12]. Expectations predict different health-related behaviours such as the intake of medication in breast cancer patients or the utilization of psychosocial help [13–15]. The role of caregivers’ expectations in healthcare communication was recently investigated in a paediatric setting [16]. In the EOL care context, expectations such as “Speaking about my own death will upset you” may especially deter persons from EOL communication. To our knowledge, there is no study that has analysed and compared the extent of different expectations of EOL

1  
2 communication in palliative patients and their caregivers in a structured and quantitative way to  
3  
4 complement existing qualitative research [11].  
5

6  
7 Apart from cognitions, emotional factors (e.g. protecting others from difficult emotions) and death  
8 anxiety prevent persons from EOL communication. Death anxiety (thanatophobia) includes the fear  
9 of death and avoidance of news that remind of death [17]. 8.2–42 percent of cancer patients  
10 showed moderate levels of death anxiety [18–21], but it is also prevalent in healthy populations [22,  
11 23]. Death anxiety can be a relevant factor in avoiding EOL topics, whereas death acceptance is  
12 associated with higher levels of awareness and ability to reflect on death and dying [24, 25]. Thus,  
13 death anxiety and the tendency to avoid death-related topics are relevant determinants to address  
14 in the context of EOL communication.  
15  
16  
17  
18  
19  
20

21  
22 Therefore, the present study examined a) who should make decisions about EOL care; b) the  
23 spectrum of expectations towards EOL communication; c) the level of EOL fears; and d) experiences  
24 with EOL communication among palliative cancer patients and their caregivers. In our research, the  
25 term palliative cancer patients refers to cancer patients with a life-limiting illness and a life  
26 expectancy of less than 12 months. Lastly, the study analysed e) the correlations between reported  
27 expectations, fears and experiences.  
28  
29  
30  
31  
32  
33

## 34 **METHODS**

### 35 **Setting**

36  
37 All patients who met the inclusion criteria from the outpatient chemotherapy centre of a University  
38 hospital were informed about the study by their treating physician. If caregivers accompanied  
39 patients to their treatment or consultation there were additionally briefed on the study. After  
40 written informed consent, a separate appointment was made to conduct a structured interview and  
41 to complete the paper-pencil-questionnaire. Patients and caregivers were interviewed by two  
42 psychology Master's students and three medical doctoral students under the supervision of CS, YN,  
43 MH and PB. Interviews took place at doctors' consultation room at the outpatient chemotherapy  
44 centre. Participants first filled in the questionnaire and were then asked the interview questions.  
45 The interviewers were trained through role plays and also prepared for difficult situations. If  
46 patients or caregivers felt distressed by the EOL topics, a psycho-oncological consultation was  
47 offered. Participants were free to discontinue the interview or the questionnaire at any time.  
48  
49  
50  
51  
52  
53  
54  
55  
56  
57  
58  
59  
60

## Participants

Inclusion criteria for all participants were sufficient German language skills and a minimum age of 18. For the patient group, a diagnosis of a malignant neoplasm with a limited prognosis judged by the surprise-question ("Would I be surprised if this patient died in the next year?") by the attending physician, was an additional inclusion criterion. Caregivers had to be a person close to the cancer patient, taking care of her or him and a potential surrogate (e.g. partner, child, parent, close friend, family member chosen by the patient etc).

## Ethics

The study was approved by the institutional review board of the Medical School, University of Marburg (AZ:47/12). Before participation, subjects gave written informed consent.

## Assessment instruments

Sociodemographic and clinical variables were assessed by the treating physician or derived from the medical records.

EOL fears, EOL expectations and the experience with EOL communication were assessed using a structured interview. The interview topic guide was developed by a group of five clinicians and researchers from different professions with expertise in the field. The interview guideline was piloted with ten palliative cancer patients from the outpatient chemotherapy centre for comprehensibility and content (pretest). The research group decided to deal with potentially stressful topics in a structured interview instead of a questionnaire, as this was considered a more sensitive approach for the patients and caregivers. All interview questions could be answered on a Likert scale from 0 ("not at all") to 4 ("totally agree" or "very much"). Three questions addressed self-determination in EOL care (e.g. "It is important to me to be self-determined."); seven questions were about persons who should decide about EOL care (e.g. "I want decisions about my medical EOL care to be taken only by myself"); six questions addressed expectations of EOL care (e.g. "I expect... emotional release/ practical support/ emotional burden/..."); and five questions were about fears regarding EOL communication (e.g. "I am very afraid of my/ my relatives' last period of life", "I avoid talking about EOL topics"). Moreover, three questions asked if and whom palliative patients and their caregivers had spoken to (in the informal or professional context; choosing from a list of conversation partners, with the option to add a free text). They were then asked whether they had

1  
2 talked about several prespecified EOL topics, such as: medical care, nursing care, organisational  
3 issues, emotional issues, social issues or religiosity/ spirituality. Each of these EOL topics was  
4 preceded by a list of examples of what this topic might involve. "Medical care": e.g. treatment of  
5 somatic problems like dyspnoea, nausea, pain or maintaining quality of life, living will, life-sustaining  
6 treatment, "emotions": e.g. feelings like grief, anger, fear or sadness", "social aspects": e.g.  
7 unresolved conflicts, dealing with relatives and friends, saying goodbye, "nursing care": e.g. nursing  
8 care while crisis and/or in the last period of life, place of dying, "organisational aspects": e.g.  
9 financial and legal issues, life pension, inheritance, or funeral, and "religiosity/spirituality": "talking  
10 e.g. about religious beliefs or desires, thoughts about death and the hereafter". Finally, three  
11 questions related to the experience of EOL communication ("burdening", "helpful", "satisfying").  
12  
13  
14  
15  
16  
17  
18  
19  
20

21 Anxiety and depression were measured using the Hospital Anxiety and Depression Scale (HADS,  
22 German-Version) [26], which is a commonly used self-administered paper-based questionnaire.  
23 Items are rated on a four-point scale and scored from 0 to 3 with a higher score indicating more  
24 anxiety/depression. Therefore, total scores for each subscale range from 0 to 21, with a Cronbach's  
25 alpha of  $\alpha=.81$  for the anxiety-scale and  $\alpha=.69$  for the depression scale.  
26  
27  
28  
29  
30

### 31 **Patient and Public Involvement**

32  
33  
34 During the interview development process, ten patients were asked in a pretest about the interview  
35 schedule (priorities, experience, and preferences). Moreover, during the pretest, patients were  
36 asked to assess the burden of the interview/ questionnaire and time required to participate in the  
37 research. Patients and the public were not otherwise involved in the design and planning of the  
38 study.  
39  
40  
41  
42  
43  
44  
45  
46  
47

### 48 **Data analysis**

49  
50 Analyses were performed using SPSS 26 (SPSS Inc. IBM, Chicago, Illinois, USA), with statistical  
51 significance set at  $p < .05$ . The data were screened for univariate outliers, missing data and violations  
52 to the assumptions of analysis. Missing data at random (2.1%) were imputed using multiple  
53 imputation. To analyse expectations, fears and experiences of EOL communication in palliative  
54 cancer patients and caregivers, and to control for possible influences of demographic and clinical  
55 characteristics, (multivariate) analysis of covariance (MANOVA and MANCOVA) and univariate  
56  
57  
58  
59  
60

1  
2 analysis of covariance (ANOVA) were conducted. For categorical data, chi-square tests were used.  
3  
4 Pearson correlations were used to analyse relationships between variables. Further details are  
5  
6 reported in the results section.  
7

## 8 RESULTS

### 9 Participants

10  
11  
12  
13  
14 A total of 165 palliative patients were eligible, of which 76 (46.1%) refused to participate. The most  
15  
16 common reasons for refusal were fear of emotional burden ( $n=32$ , 42.1%), physical exhaustion  
17  
18 ( $n=15$ , 19.7%), and the patient not wanting to talk about this topic ( $n=11$ , 14.5%). Of the 143 eligible  
19  
20 caregivers of these patients, 68 (47.6%) participated. Caregivers refused participation because of a  
21  
22 fear of emotional burden ( $n=25$ , 32.5%) and effort ( $n=18$ , 32.4%). In addition, four patients (4.49%)  
23  
24 and two caregivers (2.94%) discontinued their participation due to problems of a physical (e.g. pain)  
25  
26 or organisational nature. Thus, the final sample consisted of 85 palliative cancer patients and 66  
27  
28 caregivers. Demographic and clinical characteristics of the study participants are listed in Table 1.  
29

30 \*\*Table 1\*\*

### 31 Who should decide about end-of-life care?

32  
33  
34  
35 The item “It is important to me to be self-determined” was agreed to by 95.3 percent of patients  
36  
37 and 92.4 percent of caregivers. Moreover, 89.3 percent of patients and 89.1 percent of caregivers  
38  
39 agreed with the item: “The right to self-determination must be valid beyond death” ( $V=.98$ ,  
40  
41  $F(2,145)=0.143$ ,  $p=.869$ ,  $\eta_p^2=.002$ ). In a MANOVA, there were no significant differences between  
42  
43 patients and caregivers regarding self-determination. To specify who should decide about EOL care  
44  
45 and to analyse possible differences between patients and caregivers, a MANOVA with the between-  
46  
47 subject factor ‘status’ and seven different degrees of personal involvement in decisions about EOL  
48  
49 care (see Figure 1) as dependent variables was conducted. No significant effect of status ( $V=.97$ ,  
50  
51  $F(7,143)=0.615$ ,  $p=.743$ ,  $\eta_p^2=.029$ ) was found. Thus, patients and their caregivers reported the same  
52  
53 preferences, that patients, their caregivers and physicians should participate in a shared decision-  
54  
55 making process about EOL care.  
56

57 \*\*Figure 1\*\*

### 58 Expectations of end-of-life discussions

To analyse differences in expectations of EOL communication in the professional versus the informal context among palliative cancer patients and their caregivers, a MANOVA with the between-subject factor 'status', the within-subject factor 'context' and six different expectations of EOL fears as dependent variables was conducted (Figure 2). No significant effect of status ( $V=.93$ ,  $F(6,144)=1.757$ ,  $p=.112$ ,  $\eta_p^2=.068$ ) was found, but a significant effect of context was seen ( $V=.94$ ,  $F(6,144)=65.806$ ,  $p<.001$ ,  $\eta_p^2=.733$ ). Subsequent univariate analyses showed a higher score for the expectation of emotional relief ( $F(1,149)=46.115$ ,  $p<.001$ ,  $\eta_p^2=.236$ ) and the expectation of practical support ( $F(1,149)=38.665$ ,  $p<.001$ ,  $\eta_p^2=.206$ ) in the informal context than in the professional context. Moreover, univariate analyses showed a significant higher score in the expectation of negative emotions ( $F(1,149)=54.820$ ,  $p<.001$ ,  $\eta_p^2=.269$ ) and in the expectation regarding the emotional burden of the other person ( $F(1,149)=316.958$ ,  $p<.001$ ,  $\eta_p^2=.680$ ) in the informal context than in the professional context. There were no context effects on the expectations of refusal ( $F(1,149)=0.194$ ,  $p=.118$ ,  $\eta_p^2=.016$ ) or wishes not being respected ( $F(1,149)=0.131$ ,  $p=.320$ ,  $\eta_p^2=.007$ ).

Thus, palliative cancer patients and their caregivers reported a higher tendency to expect emotional relief and practical support from communication with their family and friends than from communication with professionals. On the other hand, they reported higher expectations of negative emotions and burdening the other person in informal communication than in communication with professionals. The results remained stable after controlling for possible confounders such as age and gender.

**\*\*Figure 2\*\***

### **End-of-life fears**

In a MANOVA with the between-subject factor status and five different aspects of EOL fears as dependent variables, a significant effect of status ( $V=.72$ ,  $F(5,143)=10.963$ ,  $p<.001$ ,  $\eta_p^2=.277$ ) was found. A subsequent univariate analysis showed a generally higher score for the wish to avoid topics of death and dying in patients ( $F(1,148)=4.623$ ,  $p=.033$ ,  $\eta_p^2=.030$ ) than in caregivers. Moreover, univariate analyses showed a significantly higher score for "I am very afraid of the last period of my/my relative's life" ( $F(1,148)=42.279$ ,  $p<.001$ ,  $\eta_p^2=.223$ ) and for "I am afraid to talk about EOL topics" ( $F(1,148)=7.702$ ,  $p=.006$ ,  $\eta_p^2=.050$ ) in caregivers than in patients. There were no status effects on the reported aspects "Thoughts about death and dying are burdening for me" ( $F(1,148)=1.219$ ,  $p=.419$ ,  $\eta_p^2=.004$ ) or "I avoid talking about EOL topics" ( $F(1,148)=.782$ ,  $p=.378$ ,  $\eta_p^2=.005$ ). Patients reported a higher tendency to avoid topics of death and dying in general,



1  
2 whereas caregivers reported higher anxiety scores (Figure 3). The results remained stable after  
3  
4 controlling for possible confounders such as age and gender.  
5

### 6 7 **Evaluation of end-of-life communication**

8  
9 Patients and caregivers were asked if they had spoken about EOL topics and with whom. Results  
10 showed that the majority of patients and caregivers had talked about the patient's last period of  
11 life, but 22.7 percent of patients and 16.7 percent of caregivers had not. The results are shown in  
12 Table 2. There were no differences between caregivers and patients in the distribution of EOL  
13 communication ( $\chi^2(4,1)=6.352$ ;  $p=.174$ ). Most patients and caregivers had talked about these  
14 themes in an informal context (55.3% and 71.2%). Main topics were medical care and emotions.  
15 Nevertheless, caregivers talked more often about nursing care ( $\chi^2(4,1)=7.930$ ;  $p=.005$ ) and social  
16 aspects ( $\chi^2(1)=11.465$ ;  $p<.001$ ) than patients. Moreover, the majority of patients found the  
17 communication helpful or very helpful (51.3%) or more or less helpful (30.3%), and satisfying or very  
18 satisfying (49.5%) or more or less satisfying (30.3%). There were no significant differences for  
19 caregivers ( $\chi^2(4,1)=1.574$ ;  $p=.814$ ) and patients ( $\chi^2(4,1)=5.228$ ;  $p=.265$ ). Of the caregivers, 48.4  
20 percent found the communication helpful or very helpful and 31.8 percent more or less helpful,  
21 while 53.1 percent found the communication satisfying and 34.8 percent more or less satisfying.  
22 Significant differences were seen in terms of emotional burden of communication ( $\chi^2(4,1)=15.160$ ;  
23  $p=.004$ ), with 26.4 percent of caregivers rating communication as burdening or very burdening, and  
24 34 percent as more or less burdening, while only 9.1 percent of the palliative cancer patients  
25 evaluated communication as burdening or very burdening, and 31.8 percent as more or less  
26 burdening.  
27  
28  
29  
30  
31  
32  
33  
34  
35  
36  
37  
38  
39  
40  
41  
42

43 **\*\*Table 2\*\***

44  
45  
46 **\*\*Table 3\*\***  
47  
48

### 49 **Associations between expectations, fears and experiences**

50  
51 Table 3 shows the cross-sectional correlations between the expectations, fears and experiences of  
52 patients and caregivers. As expected, positive experiences are associated with positive expectations  
53 and negative experiences (burden of the conversation) are associated with negative expectations  
54 and fears.  
55  
56  
57  
58  
59

### 60 **DISCUSSION**

1  
2 The study investigated the expectations and concerns of palliative cancer patients and caregivers  
3 regarding end-of-life communication. A large majority of the participants wish to be self-determined  
4 regarding EOL issues and death. Patients and caregivers unanimously wished that they should  
5 decide about EOL care together with physicians. Overall, participants reported more positive than  
6 negative expectations of EOL communication. Importantly, concerns about emotionally burdening  
7 other people with EOL communication was rated much higher in an informal context (e.g. with  
8 caregivers and/or significant others) than with professionals, even though the emotional relief was  
9 expected to be higher in the informal context than in a professional context. Caregivers reported  
10 more fears about the last period of life as well as talking about it, whereas palliative patients tended  
11 to avoid the topic of death and dying to a greater extent than their caregivers.  
12  
13  
14  
15  
16  
17  
18  
19  
20

21 In line with earlier research [27, 28], we found that three out of four patients with advanced cancer  
22 had talked about the last period of life. We found no significant differences between patients and  
23 caregivers. This means they chose to engage or not to engage in EOL discussions similarly.  
24 Remarkably, 22.6 percent of the palliative patients had never spoken to anybody about their end of  
25 life; additionally, it is not clear what “rarely” meant in each individual case. Nevertheless, the  
26 frequency of EOL communication needed by patients and their carers can be highly individual and  
27 variable. For some, repetitive conversations about the same existential dilemma or concern are  
28 valuable, can support a person's decision-making process significantly and include parting, grieving  
29 and leaving behind. For others, it can be important to clarify issues and make decisions so that they  
30 can then focus on matters of life at other times. A helpful framework can be the concept of double  
31 awareness [29]. Double awareness is the flexibility of mind between life awareness and death  
32 awareness and the possibility of simultaneously switching and tolerating the ambivalence of life and  
33 death [29]. Moreover, different EOL topics might be of relevance at different times or situations: in  
34 one time, emotions as grieving and leaving behind can be in the front, whereas in other  
35 conversations organizational or care-related topics are the ones to look at.  
36  
37  
38  
39  
40  
41  
42  
43  
44  
45  
46  
47  
48  
49

50 However, a significant proportion of patients had not communicated about EOL decisions and a  
51 large proportion of caregivers were not adequately informed. In this light, the difference in  
52 expectations between the informal context and the professional context observed in this study is of  
53 distinct importance.  
54  
55  
56  
57

58 The most notable result is that the interviewed persons expected substantial personal relief when  
59 openly talking about EOL issues in an informal context but expected the other person to be  
60

1  
2 burdened by such a conversion. Notably, this 'self-other' asymmetry applies to both groups, the  
3 palliative care patients and the caregivers. This asymmetry was not found in the professional context.  
4 On the one hand, persons expect more emotional relief and practical support from communication  
5 with loved ones, pointing out the importance and high relevance of informal caregivers in the sense  
6 of building a unit of care [1]. On the other hand, concerns about causing negative emotions and  
7 burdening the other person were dramatically higher in the informal than in the professional  
8 context. Emotion-related factors such as protective buffering can be relevant barriers to EOL  
9 communication [11]. The belief that it will hurt the other person to address death and dying seems  
10 to be very salient and a relevant barrier to EOL communication. Further research exploring possible  
11 interventions involving the dyadic perspective as unit of analysis would be worthwhile [30].  
12 However, in a professional context, this strong barrier seems to be remarkably lower. Consequently,  
13 it seems to be almost mandatory for professionals to initiate and foster EOL communication instead  
14 of waiting for initiation by the patient. This way the issue can be placed on a professional level,  
15 which might be easier to bear.  
16  
17

18 Overall, patients and their caregivers reported more positive than negative expectations of EOL  
19 communication. Given the high psychological burden of emotional stress and uncertainty due to the  
20 tense situation, the fact that positive expectations exceeded negative ones seems very promising.  
21 Specifically, expected emotional relief and increased support from communication could serve as  
22 motivating factors to initiate EOL communication. Moreover, the results show that expectations of  
23 experiencing negative emotions are correlated with EOL fears and the tendency to avoid talking.  
24 This is not surprising because avoidance is a very common reaction to fear and is part of the  
25 classification systems of phobias (e.g. thanatophobia) [18]. Therefore, another possible explanation  
26 for the first observation might be that a decisive proportion of those who had reservations towards  
27 communication about death and dying did not participate in this study, resulting in a biased sample.  
28 Of the persons who declined to participate, 42.1 percent did so out of fear of the emotional burden  
29 and 14.5 percent because the person did not want to talk about this topic. The high refusal rate  
30 seems to be a common problem in research on EOL topics. In another study with healthy  
31 participants, a similar phenomenon was found: those with higher scores for death anxiety were  
32 more likely to drop out [31]. For future research, it would be meaningful to find a way to include  
33 those people who are afraid and not open to the topic. Possibly extremely short and low-threshold  
34 questionnaires or interviews and short interventions addressing the person's expectations could be  
35 helpful.  
36  
37  
38  
39  
40  
41  
42  
43  
44  
45  
46  
47  
48  
49  
50  
51  
52  
53  
54  
55  
56  
57  
58  
59  
60

1  
2 The finding of significant correlations between expectations and experiences supports the  
3 importance of learning processes in the development of expectations [32]. Thus, if someone  
4 experienced positive end-of-life communication in the past, he/she will probably expect positive  
5 communication on these topics in the future. Moreover, a vicious circle can occur whereby a  
6 negative experience entails negative expectations which in turn lead to negative experiences in  
7 terms of a nocebo effect [33]. Further research examining the role of expectations in EOL  
8 communication in a longitudinal way could address the causal relationship between the two  
9 constructs. In a next step, interventions could be developed that aim to optimise expectations [34,  
10 35].

11  
12 Interestingly, in some areas caregivers are even more affected than patients such as anxiety levels  
13 for both EOL fears and state anxiety. This is congruent with the prior findings of Leroy et al. [36]  
14 showing that caregivers of advanced cancer patients tend to be more anxious than patients, with  
15 prevalences of 32–72 percent [37–39]. Caregivers suffer from high levels of distress, emotional  
16 burden and unmet needs [31]; thus it is relevant to incorporate dyadic programmes [40]. Alongside  
17 communication about death and dying, there are other typical problems faced by families of  
18 advanced cancer patients such as dealing with feelings of separation and loss, role overload, the  
19 need to conceal feelings, feelings of isolation, fatigue and exhaustion, and feelings of inadequacy  
20 regarding necessary skills [41]. Therefore, as a clinical implication, we suggest that a holistic high  
21 quality EOL care approach should not only focus on patients but also provide as much support as  
22 possible for caregivers and close friends .

23  
24 Some limitations must be considered when interpreting the results of this study. Firstly, the items  
25 used in the semi-structured interview in this study were developed by the investigators and were  
26 not based on a validated instrument. Nevertheless, most research in this area has been qualitative,  
27 so this study can be a helpful addition to the existing research. Secondly, the study was cross-  
28 sectional, showing only correlations but no causal associations between expectations, fears and  
29 experiences. It would be worthwhile to evaluate these associations in further longitudinal studies.  
30 Thirdly, most of the caregivers were female. Further studies with a balanced gender distribution  
31 would be valuable. Finally, due to the high refusal rate, it cannot be excluded that the results are  
32 influenced by selection bias. Thus, the results cannot be transferred to other populations.  
33 Nevertheless, the fact that many people refused study participation due to fear of emotional burden  
34 underlines the importance of the topic and the relevance of expectations.

1  
2  
3  
4  
5  
6  
7  
8  
9  
10  
11  
12  
13  
14  
15  
16  
17  
18  
19  
20  
21  
22  
23  
24  
25  
26  
27  
28  
29  
30  
31  
32  
33  
34  
35  
36  
37  
38  
39  
40  
41  
42  
43  
44  
45  
46  
47  
48  
49  
50  
51  
52  
53  
54  
55  
56  
57  
58  
59  
60

To conclude, there seems to exist a 'self-other' asymmetry: palliative patients and their caregivers expect substantial personal relief when openly talking about end-of-life issues, but also expect other people to be burdened by such conversations. Professionals repeatedly need to initiate end-of-life communication to help families speaking about end-of-life issues.

For peer review only

## Availability of data and materials

The datasets generated and analysed during the current study are available from the corresponding author upon reasonable request.

## Ethical approval

The study was approved by the institutional review board of the Medical School, Philipps-University of Marburg (AZ:47/12). This study was performed in line with the principles of the Declaration of Helsinki.

## Consent to participate

Written informed consent was obtained from all individual participants included in the study.

## Consent for publication

Participants signed informed consent regarding publishing their data in an anonymous form.

## Contributors

CS, WR, YN, US and JRK planned the study and revised the manuscript, HJF accomplished the interviews, MH, PvB and CS supervised the study, PvB conducted the analysis, interpreted the data, drafted the article.

## Funding

The authors received no funding for this study.

## Competing interests

The authors have no conflicts of interest to declare that are relevant to the content of this article.

## Acknowledgements

The authors thank Anna Pedrosa Carrasco for language editing.

## REFERENCES

- 1 Connor SR. Hospice and palliative care: The essential guide: Taylor & Francis 2017.
- 2 Wenger NS, Oye RK, Bellamy PE, et al. Prior capacity of patients lacking decision making ability early in hospitalization. *Journal of General Internal Medicine* 1994;9(10):539–43.
- 3 Raymont V, Bingley W, Buchanan A, et al. Prevalence of mental incapacity in medical inpatients and associated risk factors: cross-sectional study. *The Lancet* 2004;364(9443):1421–27.
- 4 Fried TR, Zenoni M, Iannone L, et al. Assessment of surrogates' knowledge of patients' treatment goals and confidence in their ability to make surrogate treatment decisions. *JAMA Intern Med* 2019;179(2):267–68.
- 5 Sinuff T, Dodek P, You JJ, et al. Improving End-of-Life Communication and Decision Making: The Development of a Conceptual Framework and Quality Indicators. *J Pain Symptom Manage* 2015;49(6):1070–80.
- 6 Seifart C, Knorrnschild JR, Hofmann M, et al. Let us talk about death: gender effects in cancer patients' preferences for end-of-life discussions. *Support Care Cancer* 2020:1–9.
- 7 Yamamoto S, Arao H, Masutani E, et al. Decision Making Regarding the Place of End-of-Life Cancer Care: The Burden on Bereaved Families and Related Factors. *J Pain Symptom Manage* 2017;53(5):862–70.
- 8 Wendler D, Rid A. Systematic Review: The Effect on Surrogates of Making Treatment Decisions for Others. *Ann Intern Med* 2011;154(5):336–46.
- 9 Yamaguchi T, Maeda I, Hatano Y, et al. Effects of End-of-Life Discussions on the Mental Health of Bereaved Family Members and Quality of Patient Death and Care. *J Pain Symptom Manage* 2017;54(1):17-26.e1.
- 10 Bachner YG, Carmel S. Open communication between caregivers and terminally ill cancer patients: the role of caregivers' characteristics and situational variables. *Health Commun* 2009;24(6):524–31.
- 11 Nagelschmidt K, Leppin N, Seifart C, et al. Systematic mixed-method review of barriers to end-of-life communication in the family context. *BMJ Support Palliat Care* 2020.
- 12 Rief W, Glombiewski JA, Gollwitzer M, et al. Expectancies as core features of mental disorders. *Curr Opin Psychiatry* 2015;28(5):378–85.
- 13 Laferton JAC, Kube T, Salzmann S, et al. Patients' Expectations Regarding Medical Treatment: A Critical Review of Concepts and Their Assessment. *Front Psychol* 2017;8:233.
- 14 Pan Y, Heisig SR, Blanckenburg P von, et al. Facilitating adherence to endocrine therapy in breast cancer: Stability and predictive power of treatment expectations in a 2-year prospective study. *Breast Cancer Res Treat* 2018;168(3):667–77.
- 15 Have M ten, Graaf R de, Ormel J, et al. Are attitudes towards mental health help-seeking associated with service use? Results from the European Study of Epidemiology of Mental Disorders. *Soc Psychiatry Psychiatr Epidemiol* 2010;45(2):153–63.
- 16 Lee T, Cui J, Rosario H, et al. Assessment of caregiver expectations of physician communication in a pediatric setting. *BMC Health Serv Res* 2020;20(1):408.
- 17 Fava GA, Cosci F, Sonino N. Current Psychosomatic Practice. *Psychother Psychosom* 2017;86(1):13–30.
- 18 Grassi L, Sabato S, Rossi E, et al. Use of the diagnostic criteria for psychosomatic research in oncology. *Psychother Psychosom* 2005;74(2):100–07.
- 19 Soleimani MA, Bahrami N, Allen K-A, et al. Death anxiety in patients with cancer: A systematic review and meta-analysis. *European Journal of Oncology Nursing* 2020:101803.
- 20 Gonen G, Kaymak SU, Cankurtaran ES, et al. The factors contributing to death anxiety in cancer patients. *Journal of Psychosocial Oncology* 2012;30(3):347–58.
- 21 Neel C, Lo C, Rydall A, et al. Determinants of death anxiety in patients with advanced cancer. *BMJ Support Palliat Care* 2015;5(4):373–80. doi:10.1136/bmjspcare-2012-000420

- 1  
2 22 Sinoff G. Thanatophobia (Death Anxiety) in the Elderly: The Problem of the Child's Inability  
3 to Assess Their Own Parent's Death Anxiety State. *Frontiers in Medicine* 2017;4:11.  
4 <https://www.frontiersin.org/article/10.3389/fmed.2017.00011>.
- 5 23 Neimeyer RA, Wittkowski J, Moser R. Psychological research on death attitudes.: An  
6 overview and evaluation. *Death Studies* 2004;28(4):309–40.
- 7 24 McGrath P. Affirming the connection: comparative findings on communication issues from  
8 hospice patients and hematology survivors. *Death Studies* 2004;28(9):829–48.
- 9 25 Tong E, Deckert A, Gani N, et al. The meaning of self-reported death anxiety in advanced  
10 cancer. *Palliat Med* 2016;30(8):772–79.
- 11 26 Zigmond AS, Snaith RP. The Hospital Anxiety and Depression Scale. *Acta Psychiatrica*  
12 *Scandinavica* 1983;67(6):361–70.
- 13 27 Mack JW, Weeks JC, Wright AA, et al. End-of-life discussions, goal attainment, and distress  
14 at the end of life: predictors and outcomes of receipt of care consistent with preferences. *J Clin*  
15 *Oncol* 2010;28(7):1203–08.
- 16 28 Wright AA, Zhang B, Ray A, et al. Associations between end-of-life discussions, patient  
17 mental health, medical care near death, and caregiver bereavement adjustment. *JAMA*  
18 2008;300(14):1665–73.
- 19 29 Colosimo K, Nissim R, Pos AE, et al. “Double awareness” in psychotherapy for patients living  
20 with advanced cancer. *Journal of Psychotherapy Integration* 2018;28(2):125–40.
- 21 30 Badr H, Krebs P. A systematic review and meta-analysis of psychosocial interventions for  
22 couples coping with cancer. *Psychooncology* 2013;22(8):1688–704. doi:10.1002/pon.3200
- 23 31 Blanckenburg P von, Leppin N, Nagelschmidt K, et al. Matters of Life and Death: An  
24 Experimental Study Investigating Psychological Interventions to Encourage the Readiness for  
25 End-of-Life Conversations. *Psychother Psychosom* 2020.  
26 <https://www.karger.com/DOI/10.1159/000511199>.
- 27 32 Petrie KJ, Rief W. Psychobiological Mechanisms of Placebo and Nocebo Effects: Pathways to  
28 Improve Treatments and Reduce Side Effects. *Annu Rev Psychol* 2019:599–625.  
29 doi:10.1146/annurev-psych-010418-102907
- 30 33 Colloca L, Barsky AJ. Placebo and Nocebo Effects. *N Engl J Med* 2020;382(6):554–61.
- 31 34 Blanckenburg P von, Schuricht F, Albert U-S, et al. Optimizing expectations to prevent side  
32 effects and enhance quality of life in breast cancer patients undergoing endocrine therapy:  
33 Study protocol of a randomized controlled trial. *BMC Cancer* 2013;13:426.
- 34 35 Shedden-Mora MC, Pan Y, Heisig SR, et al. Optimizing Expectations About Endocrine  
35 Treatment for Breast Cancer: Results of the Randomized Controlled PSY-BREAST Trial.  
36 *Clinical Psychology in Europe* 2020;2(1):1–20.
- 37 36 Leroy T, Fournier E, Penel N, et al. Crossed views of burden and emotional distress of cancer  
38 patients and family caregivers during palliative care. *Psychooncology* 2016;25(11):1278–85.  
39 doi:10.1002/pon.4056.
- 40 37 Götze H, Brähler E, Gansera L, et al. Psychological distress and quality of life of palliative  
41 cancer patients and their caring relatives during home care. *Support Care Cancer*  
42 2014;22(10):2775–82. doi:10.1007/s00520-014-2257-5.
- 43 38 Grunfeld E, Coyle D, Whelan T, et al. Family caregiver burden: results of a longitudinal study  
44 of breast cancer patients and their principal caregivers. *CMAJ* 2004;170(12):1795–801.
- 45 39 Oechsle K. Current Advances in Palliative & Hospice Care: Problems and Needs of Relatives  
46 and Family Caregivers During Palliative and Hospice Care-An Overview of Current  
47 Literature. *Med Sci* 2019;7(3).
- 48 40 Northouse LL, Mood DW, Schafenacker A, et al. Randomized clinical trial of a brief and  
49 extensive dyadic intervention for advanced cancer patients and their family caregivers.  
50 *Psychooncology* 2013;22(3):555–63. doi:10.1002/pon.3036.
- 51 41 Sales E. Family burden and quality of life. *Qual Life Res* 2003;12(1):33–41.
- 52  
53  
54  
55  
56  
57  
58  
59  
60



1  
2 **Figure legends**  
3

4  
5 Figure 1. Persons who should decide about end-of-life care  
6

7 Figure 2. Expectations of end-of-life discussions among cancer patients and caregivers in an informal versus a  
8 professional context  
9

10  
11 Figure 3. End-of-life fears among cancer patients and caregivers  
12  
13  
14  
15  
16  
17  
18  
19  
20  
21  
22  
23  
24  
25  
26  
27  
28  
29  
30  
31  
32  
33  
34  
35  
36  
37  
38  
39  
40  
41  
42  
43  
44  
45  
46  
47  
48  
49  
50  
51  
52  
53  
54  
55  
56  
57  
58  
59  
60

For peer review only

Table 1. Sociodemographic and medical data of the study sample

| Variables            |                                    | Patients (N=85) | Caregivers (N=66) | Group Differences     |
|----------------------|------------------------------------|-----------------|-------------------|-----------------------|
|                      |                                    | N (%) / M (SD)  | N (%) / M (SD)    | t- / $\chi^2$ - Value |
| Age in years         |                                    | 62.8 (11.4)     | 56.3 (12.7)       | 3.24, $p=.002$        |
| Gender (male)        |                                    | 56 (65.9%)      | 19 (28.8%)        | 20.45, $p<.001$       |
| Years of education   | 9                                  | 52 (61.2%)      | 33 (50%)          | 3.442, $p=.328$       |
|                      | 10                                 | 15 (17.9%)      | 18 (27.3%)        |                       |
|                      | 12-13                              | 16 (18.8%)      | 15 (22.7%)        |                       |
| Working Status       | Working                            | 4 (4.8 %)       | 39 (59.1%)        | 64.85, $p<.001$       |
|                      | Disability pension                 | 16 (18.8 %)     | 3 (4.7%)          |                       |
|                      | Pension                            | 37 (43.5 %)     | 15 (23.4 %)       |                       |
|                      | On sick leave                      | 21 (24.7 %)     | 1 (1.6 %)         |                       |
|                      | Unemployed                         | 1 (1.2 %)       | 3 (4.7 %)         |                       |
|                      | Housewife/man                      | 5 (5.9 %)       | 3 (4.7 %)         |                       |
| Family Status        | Married                            | 53 (62.4 %)     | 48 (72.7%)        | 9.278. $p=.026$       |
|                      | Divorced                           | 14 (16.5 %)     | 3 (4.5%)          |                       |
|                      | Single                             | 7 (8.2 %)       | 11 (16.7%)        |                       |
|                      | Widowed                            | 11 (12.9 %)     | 4 (6.1%)          |                       |
|                      | Living together with partner (yes) | 62 (72.9 %)     | 55 (83.3%)        |                       |
|                      | Children (yes)                     | 73 (85.9 %)     | 53 (80.3%)        |                       |
| Religious Confession | Catholic                           | 15 (17.6 %)     | 11 (16.7 %)       | 1.244, $p=.742$       |
|                      | Protestant                         | 55 (64.7 %)     | 45 (68.2 %)       |                       |
|                      | Other                              | 2 (2.4 %)       | 3 (4.5 %)         |                       |
|                      | None                               | 13 (15.4 %)     | 7 (10.6 %)        |                       |
| Relation to Patient  | Partner                            |                 | 44 (66.7 %)       |                       |
|                      | Son/ Daughter                      |                 | 15 (22.7 %)       |                       |
|                      | Parent                             |                 | 1 (1.5 %)         |                       |
|                      | Other                              |                 | 6 (9.1 %)         |                       |
| Tumor group          | Lung                               | 25 (29.4 %)     |                   |                       |
|                      | Gastro-intestinal                  | 14 (16.5 %)     |                   |                       |
|                      | Hepatobiliary                      | 3 (3.5 %)       |                   |                       |
|                      | Urogenital                         | 8 (9.4 %)       |                   |                       |
|                      | Gynecological                      | 7 (8.2 %)       |                   |                       |
|                      | ENT (ear, nose, throat)            | 2 (2.4 %)       |                   |                       |

1  
2  
3  
4  
5  
6  
7  
8  
9  
10  
11  
12  
13  
14  
15  
16  
17  
18  
19  
20  
21  
22  
23  
24  
25  
26  
27  
28  
29  
30  
31  
32  
33  
34  
35  
36  
37  
38  
39  
40  
41  
42  
43  
44  
45  
46  
47  
48  
49  
50  
51  
52  
53  
54  
55  
56  
57  
58  
59  
60

|                 |                                 |             |             |                  |
|-----------------|---------------------------------|-------------|-------------|------------------|
|                 | Brain tumor/<br>Medulloblastome | 4 (4.7 %)   |             |                  |
|                 | Haematological                  | 10 (11.8 %) |             |                  |
|                 | Other                           | 12 (14.1 %) |             |                  |
| Treatment       | Chemotherapy                    | 72 (84.7 %) | -           |                  |
|                 | Radiation                       | 49 (57.6 %) | -           |                  |
|                 | Surgery                         | 43 (50.6 %) | -           |                  |
| HADS Depression |                                 | 5.64 (3.21) | 6.67 (3.09) | -1.971, $p=.051$ |
| HADS Anxiety    |                                 | 5.83 (3.49) | 8.97 (3.63) | -5.368, $p<.001$ |

For peer review only

**Table 2.** Communication partner in end-of-life communication

| <b>End-of-life communication</b>                                 |                           | <b>Patients<br/>(n=84)</b> | <b>Caregivers<br/>(n=65)</b> |            |
|------------------------------------------------------------------|---------------------------|----------------------------|------------------------------|------------|
| <b>Have you spoken about (your/his/her) last period-of life?</b> | A lot                     | 3 (3.5%)                   | 5 (7.6%)                     |            |
|                                                                  | Frequently                | 10 (11.8%)                 | 16 (24.4%)                   |            |
|                                                                  | From time to time         | 31 (36.5%)                 | 22 (33.3%)                   |            |
|                                                                  | Rarely                    | 21 (24.7%)                 | 11 (16.7%)                   |            |
|                                                                  | Never                     | 19 (22.4%)                 | 11 (16.7%)                   |            |
| <b>In which Context did you talk about end-of-life topics?</b>   | Professional Context      | Physician                  | 26 (30.6%)                   | 25 (37.9%) |
|                                                                  |                           | Nurse                      | 2 (2.4%)                     | 7 (10.6%)  |
|                                                                  |                           | Pastor                     | 10 (11.8%)                   | 4 (6.1%)   |
|                                                                  |                           | Psychologist               | 4 (4.7%)                     | 5 (7.6%)   |
|                                                                  | Informal Context          | Family                     | 47 (55.3%)                   | 47 (71.2%) |
|                                                                  |                           | Partner                    | 45 (52.9%)                   | 43 (65.2%) |
|                                                                  |                           | Friends                    | 30 (35.3%)                   | 30 (55.6%) |
|                                                                  |                           | Other patients             | 5 (5.9%)                     | 10 (15.2%) |
|                                                                  |                           | With the patient himself   | -                            | 45 (68.2%) |
|                                                                  |                           | -                          | -                            | -          |
| <b>What kind of topics have you spoken about?</b>                | Medical Care              | 49 (57.6%)                 | 47 (71.2%)                   |            |
|                                                                  | Nursing Care              | 34 (40.0%)                 | 42 (63.6%)                   |            |
|                                                                  | Religiosity/ Spirituality | 23 (27.1%)                 | 27 (40.9%)                   |            |
|                                                                  | Organizational aspects    | 54 (23.5%)                 | 46 (69.7%)                   |            |
|                                                                  | Emotions                  | 42 (49.4%)                 | 46 (69.7%)                   |            |
|                                                                  | Social aspects            | 24 (28.2%)                 | 37 (56.1%)                   |            |

**Table 3.** Correlations between the expectations, fears and experiences in patients and caregivers

|                                        | 1             | 2             | 3             | 4             | 5             | 6             | 7              | 8             | 9             | 10            | 11             | 12             | 13            |
|----------------------------------------|---------------|---------------|---------------|---------------|---------------|---------------|----------------|---------------|---------------|---------------|----------------|----------------|---------------|
| <b>Expectations</b>                    |               |               |               |               |               |               |                |               |               |               |                |                |               |
| 1 emotional relief                     | -             |               |               |               |               |               |                |               |               |               |                |                |               |
| 2 practical support                    | <b>.777**</b> | -             |               |               |               |               |                |               |               |               |                |                |               |
| 3 negative emotions                    | .099          | -.008         | -             |               |               |               |                |               |               |               |                |                |               |
| 4 refusal                              | -.046         | -.150         | <b>.344**</b> | -             |               |               |                |               |               |               |                |                |               |
| 5 my wishes not to be respected        | -.072         | <b>-.175*</b> | <b>.173*</b>  | <b>.645**</b> | -             |               |                |               |               |               |                |                |               |
| 6 emotional burden of the other person | .024          | .039          | <b>.441**</b> | <b>.166*</b>  | <b>.175*</b>  | -             |                |               |               |               |                |                |               |
| <b>Fears</b>                           |               |               |               |               |               |               |                |               |               |               |                |                |               |
| 7 avoidance of the topic               | -.066         | -.85          | .090          | -.063         | .017          | 0.64          | -              |               |               |               |                |                |               |
| 8 thoughts are burdening               | .045          | -.044         | <b>.375**</b> | .064          | .079          | <b>.286**</b> | <b>.376**</b>  | -             |               |               |                |                |               |
| 9 very afraid of eol                   | .136          | -.015         | <b>.383**</b> | .129          | .036          | <b>.187*</b>  | .029           | <b>.387**</b> | -             |               |                |                |               |
| 10 afraid of talking                   | .096          | .040          | <b>.502**</b> | <b>.240**</b> | .162*         | .210          | .139           | <b>.280**</b> | <b>.465**</b> | -             |                |                |               |
| 11 avoidance of talking                | .013          | .036          | <b>.256**</b> | .138          | .100          | <b>.222**</b> | <b>.374**</b>  | <b>.348**</b> | <b>.168*</b>  | <b>.516**</b> | -              |                |               |
| <b>Experiences</b>                     |               |               |               |               |               |               |                |               |               |               |                |                |               |
| 12 burdening                           | -.005         | -.102         | <b>.499**</b> | <b>.302**</b> | .177          | <b>.232*</b>  | .017           | <b>.382**</b> | <b>.478**</b> | <b>.438**</b> | <b>.209*</b>   | -              |               |
| 13 helpful                             | <b>.362**</b> | <b>.320**</b> | -.104         | -.127         | -.111         | .061          | <b>-.331**</b> | -.130         | .012          | <b>-.232*</b> | <b>-.316**</b> | <b>-.247**</b> | -             |
| 14 satisfied                           | <b>.232*</b>  | <b>.211*</b>  | -.156         | <b>-.183*</b> | <b>-.203*</b> | -.049         | -.129          | -.048         | -.048         | -.081         | -.053          | <b>-.419**</b> | <b>.506**</b> |

Note. \*p<.05, \*\*p<.01, (n=118-151)

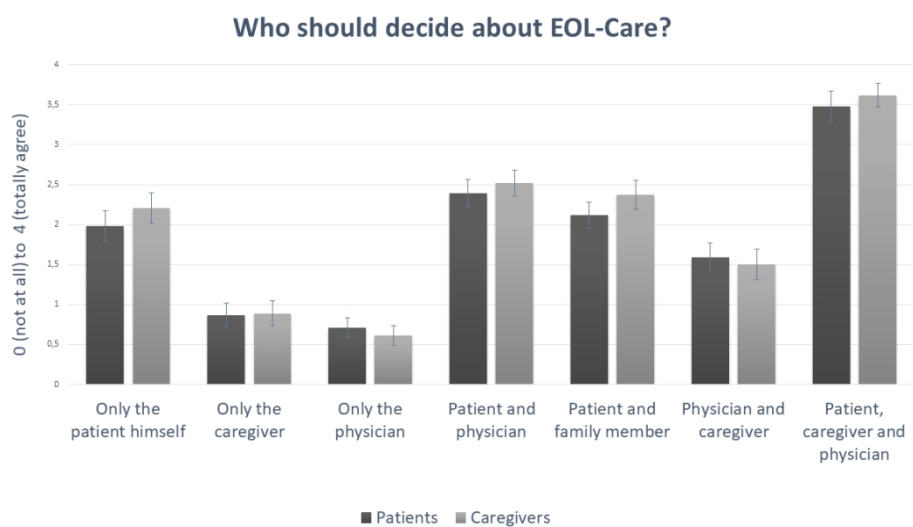

Figure 1. Persons who should decide about end-of-life care

855x481mm (38 x 38 DPI)

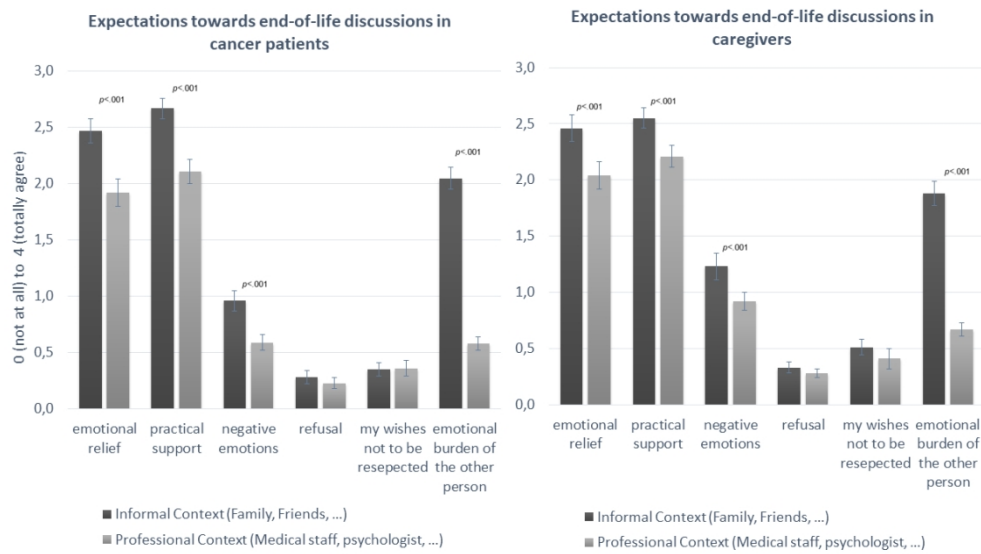

Figure 2. Expectations of end-of-life discussions among cancer patients and caregivers in an informal versus a professional context

855x481mm (38 x 38 DPI)

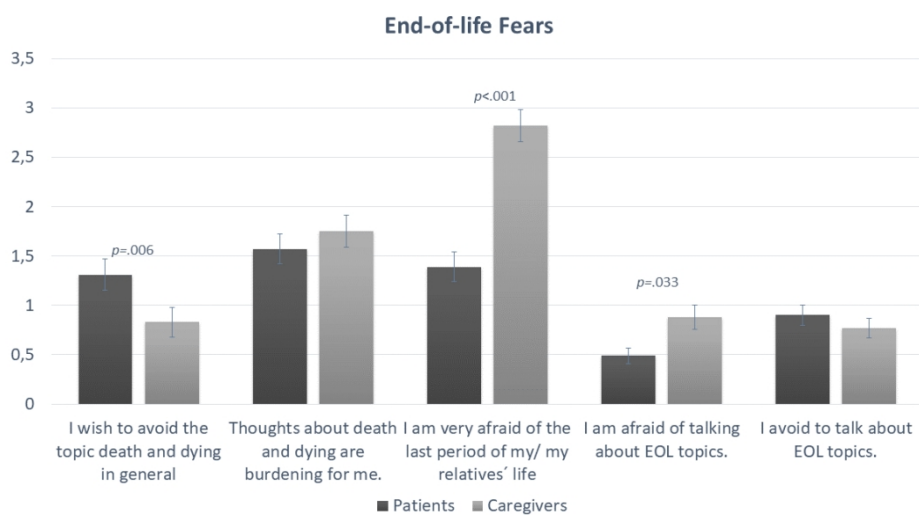

Figure 3. End-of-life fears among cancer patients and caregivers

855x481mm (38 x 38 DPI)



STROBE Statement—Checklist of items that should be included in reports of *cohort studies*

|                              | Item No | Recommendation                                                                                                                                                                                                                                                                                                         | Page No |
|------------------------------|---------|------------------------------------------------------------------------------------------------------------------------------------------------------------------------------------------------------------------------------------------------------------------------------------------------------------------------|---------|
| <b>Title and abstract</b>    | 1       | (a) Indicate the study's design with a commonly used term in the title or the abstract<br>(b) Provide in the abstract an informative and balanced summary of what was done and what was found                                                                                                                          | 3<br>3  |
| <b>Introduction</b>          |         |                                                                                                                                                                                                                                                                                                                        |         |
| Background/rationale         | 2       | Explain the scientific background and rationale for the investigation being reported                                                                                                                                                                                                                                   | 4f      |
| Objectives                   | 3       | State specific objectives, including any prespecified hypotheses                                                                                                                                                                                                                                                       | 5       |
| <b>Methods</b>               |         |                                                                                                                                                                                                                                                                                                                        |         |
| Study design                 | 4       | Present key elements of study design early in the paper                                                                                                                                                                                                                                                                | 5       |
| Setting                      | 5       | Describe the setting, locations, and relevant dates, including periods of recruitment, exposure, follow-up, and data collection                                                                                                                                                                                        | 5       |
| Participants                 | 6       | (a) Give the eligibility criteria, and the sources and methods of selection of participants. Describe methods of follow-up<br>(b) For matched studies, give matching criteria and number of exposed and unexposed                                                                                                      | 5       |
| Variables                    | 7       | Clearly define all outcomes, exposures, predictors, potential confounders, and effect modifiers. Give diagnostic criteria, if applicable                                                                                                                                                                               | 5f      |
| Data sources/<br>measurement | 8*      | For each variable of interest, give sources of data and details of methods of assessment (measurement). Describe comparability of assessment methods if there is more than one group                                                                                                                                   | 5       |
| Bias                         | 9       | Describe any efforts to address potential sources of bias                                                                                                                                                                                                                                                              | 6       |
| Study size                   | 10      | Explain how the study size was arrived at                                                                                                                                                                                                                                                                              | 6       |
| Quantitative variables       | 11      | Explain how quantitative variables were handled in the analyses. If applicable, describe which groupings were chosen and why                                                                                                                                                                                           | 6       |
| Statistical methods          | 12      | (a) Describe all statistical methods, including those used to control for confounding<br>(b) Describe any methods used to examine subgroups and interactions<br>(c) Explain how missing data were addressed<br>(d) If applicable, explain how loss to follow-up was addressed<br>(e) Describe any sensitivity analyses | 6       |
| <b>Results</b>               |         |                                                                                                                                                                                                                                                                                                                        |         |
| Participants                 | 13*     | (a) Report numbers of individuals at each stage of study—eg numbers potentially eligible, examined for eligibility, confirmed eligible, included in the study, completing follow-up, and analysed<br>(b) Give reasons for non-participation at each stage<br>(c) Consider use of a flow diagram                        | 6       |
| Descriptive data             | 14*     | (a) Give characteristics of study participants (eg demographic, clinical, social) and information on exposures and potential confounders<br>(b) Indicate number of participants with missing data for each variable of interest<br>(c) Summarise follow-up time (eg, average and total amount)                         | Table 1 |
| Outcome data                 | 15*     | Report numbers of outcome events or summary measures over time                                                                                                                                                                                                                                                         | 7ff     |

|                                           |                          |    |                                                                                                                                                                                                                                                                                                                                                                                                                   |                                       |
|-------------------------------------------|--------------------------|----|-------------------------------------------------------------------------------------------------------------------------------------------------------------------------------------------------------------------------------------------------------------------------------------------------------------------------------------------------------------------------------------------------------------------|---------------------------------------|
| 1<br>2<br>3<br>4<br>5<br>6<br>7<br>8<br>9 | Main results             | 16 | (a) Give unadjusted estimates and, if applicable, confounder-adjusted estimates and their precision (eg, 95% confidence interval). Make clear which confounders were adjusted for and why they were included<br><br>(b) Report category boundaries when continuous variables were categorized<br>(c) If relevant, consider translating estimates of relative risk into absolute risk for a meaningful time period | 6-9,<br>Table<br>2,<br>and<br>Figures |
| 10<br>11<br>12                            | Other analyses           | 17 | Report other analyses done—eg analyses of subgroups and interactions, and sensitivity analyses                                                                                                                                                                                                                                                                                                                    | Table<br>3                            |
| 13                                        | <b>Discussion</b>        |    |                                                                                                                                                                                                                                                                                                                                                                                                                   |                                       |
| 14                                        | Key results              | 18 | Summarise key results with reference to study objectives                                                                                                                                                                                                                                                                                                                                                          | 9                                     |
| 15<br>16<br>17                            | Limitations              | 19 | Discuss limitations of the study, taking into account sources of potential bias or imprecision. Discuss both direction and magnitude of any potential bias                                                                                                                                                                                                                                                        | 12                                    |
| 18<br>19                                  | Interpretation           | 20 | Give a cautious overall interpretation of results considering objectives, limitations, multiplicity of analyses, results from similar studies, and other relevant evidence                                                                                                                                                                                                                                        | 9-12                                  |
| 20<br>21                                  | Generalisability         | 21 | Discuss the generalisability (external validity) of the study results                                                                                                                                                                                                                                                                                                                                             | 12                                    |
| 22                                        | <b>Other information</b> |    |                                                                                                                                                                                                                                                                                                                                                                                                                   |                                       |
| 23<br>24<br>25                            | Funding                  | 22 | Give the source of funding and the role of the funders for the present study and, if applicable, for the original study on which the present article is based                                                                                                                                                                                                                                                     | 13                                    |

\*Give information separately for exposed and unexposed groups.

**Note:** An Explanation and Elaboration article discusses each checklist item and gives methodological background and published examples of transparent reporting. The STROBE checklist is best used in conjunction with this article (freely available on the Web sites of PLoS Medicine at <http://www.plosmedicine.org/>, Annals of Internal Medicine at <http://www.annals.org/>, and Epidemiology at <http://www.epidem.com/>). Information on the STROBE Initiative is available at <http://www.strobe-statement.org>.
